# Supplementary material
Source: PubMed Central journal article supplement (PMC7296983)
Supplement: NIHMS1062231-supplement-supplementary_file.pdf [file NIHMS1062231-supplement-supplementary_file.pdf]

## Supporting Information

### Novel Propargyl-linked Bisubstrate Analogs as Tight-binding

#### Inhibitors for Nicotinamide N-Methyltransferase

*Dongxing Chen<sup>†,§</sup>, Linjie Li<sup>†,§</sup>, Krystal Diaz<sup>†</sup>, Iredia D. Iyamu<sup>†</sup>, Ravi Yadav<sup>‡</sup>, Nicholas Noinaj<sup>‡</sup>, and Rong Huang<sup>\*,†</sup>*

<sup>†</sup>Department of Medicinal Chemistry and Molecular Pharmacology, Center for Cancer Research, Institute for Drug Discovery, Purdue University, West Lafayette, Indiana 47907, United States.

<sup>‡</sup>Markey Center for Structural Biology, Department of Biological Sciences and the Purdue Institute of Inflammation, Immunology and Infectious Disease, Purdue University, West Lafayette, Indiana 47907, United States.

<sup>§</sup>These authors contributed equally.

\* Correspondence should be addressed to R.H. (huang-r@purdue.edu)

#### Table of Contents

|    |                                                                                                                  |     |
|----|------------------------------------------------------------------------------------------------------------------|-----|
| A. | General procedures for the synthesis of <b>S3</b>                                                                | S3  |
| B. | NMR spectra of compound <b>S3</b> , <b>6a-i</b> , <b>9a-d</b> , and <b>12a-b</b>                                 | S4  |
| C. | NMR, MALDI-MS and HPLC spectra of compound <b>1a-j</b> , <b>1a*</b> , <b>2a-d</b> , <b>2a*</b> , and <b>3a-b</b> | S13 |
| D. | Supporting Figure S1. Kinetic parameter determination for NNMT                                                   | S44 |
| E. | Supporting Figure S2. Rapid dilution assay for compound LL320 ( <b>2a</b> )                                      | S45 |
| F. | Supporting Figure S3. The selectivity study of LL320 ( <b>2a</b> )                                               | S46 |
| G. | Supporting Figure S4. Superimposed co-crystal structures                                                         | S47 |
| H. | Supporting Figure S5. Cell permeability evaluation of TAT peptide as positive control                            | S48 |
| I. | Supporting Figure S6. Cell permeability evaluation of <b>1a*</b>                                                 | S49 |
| J. | Supporting Figure S7. Cell permeability evaluation of <b>2a*</b>                                                 | S50 |
| K. | Supporting Table S1. Crystallography data and refinement statistics (PDB ID: 6PVE and 6PVS)                      | S51 |



## General procedures for the synthesis of S3

### Scheme S1. Synthetic route of S3.<sup>a</sup>

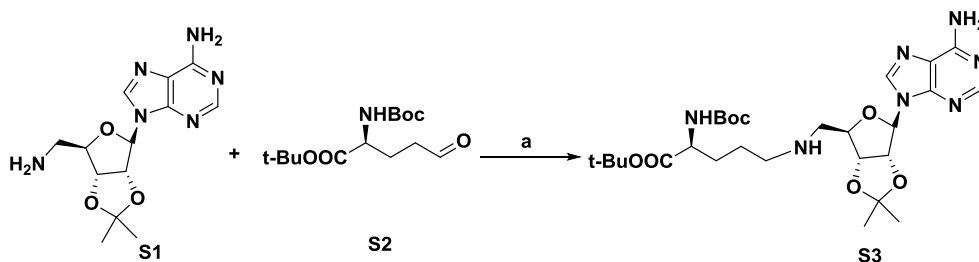

<sup>a</sup>Reagents and conditions: (a) NaBH<sub>3</sub>CN, MeOH, r.t., 64%.

Tert-butyl (S)-5-((((3aR,4R,6S,6aR)-6-((6-amino-9H-purin-9-yl)-2,2-dimethyltetrahydrofuro[3,4-d][1,3]dioxol-4-yl)methyl)amino)-2-((tert-butoxycarbonyl)amino)pentanoate (**S3**). To a solution of 9-((3aR,4S,6R,6aR)-6-(aminomethyl)-2,2-dimethyltetrahydrofuro[3,4-d][1,3]dioxol-4-yl)-9H-purin-6-amine (**S1**)<sup>1</sup> (0.33 g, 1.0 mmol) in methanol, tert-butyl (S)-2-((tert-butoxycarbonyl)amino)-5-oxopentanoate (**S2**)<sup>2</sup> (0.4 g, 1.4 mmol) was added in to the reaction. The mixture stirred for 30min at r.t.. Then NaBH<sub>3</sub>CN (94 mg, 1.5 mmol) was add to the reaction. After 6 h, the solvent was removed in vacuum and the residue was purified by column chromatography (CH<sub>2</sub>Cl<sub>2</sub>:MeOH = 25: 1) to get 0.4 g product (64%). <sup>1</sup>H NMR (500 MHz, Chloroform-*d*) δ 8.27 (s, 1H), 7.96 (s, 1H), 6.22 – 6.07 (m, 1H), 5.50 – 5.32 (m, 2H), 5.12 – 5.02 (m, 1H), 4.70 – 4.50 (m, 1H), 4.19 – 4.07 (m, 1H), 3.16 – 3.00 (m, 2H), 3.00 – 2.79 (m, 2H), 1.87 – 1.78 (m, 1H), 1.72-1.65 (m, 3H), 1.63 (s, 3H), 1.43 (s, 9H), 1.40 (s, 9H), 1.39 (s, 3H).

# NMR spectra of compound S3, 6a-j, 9a-d, and 12a-b

## HNMR of S3

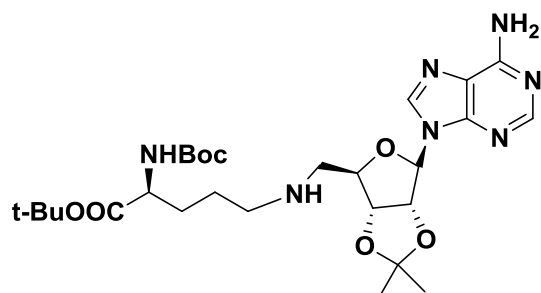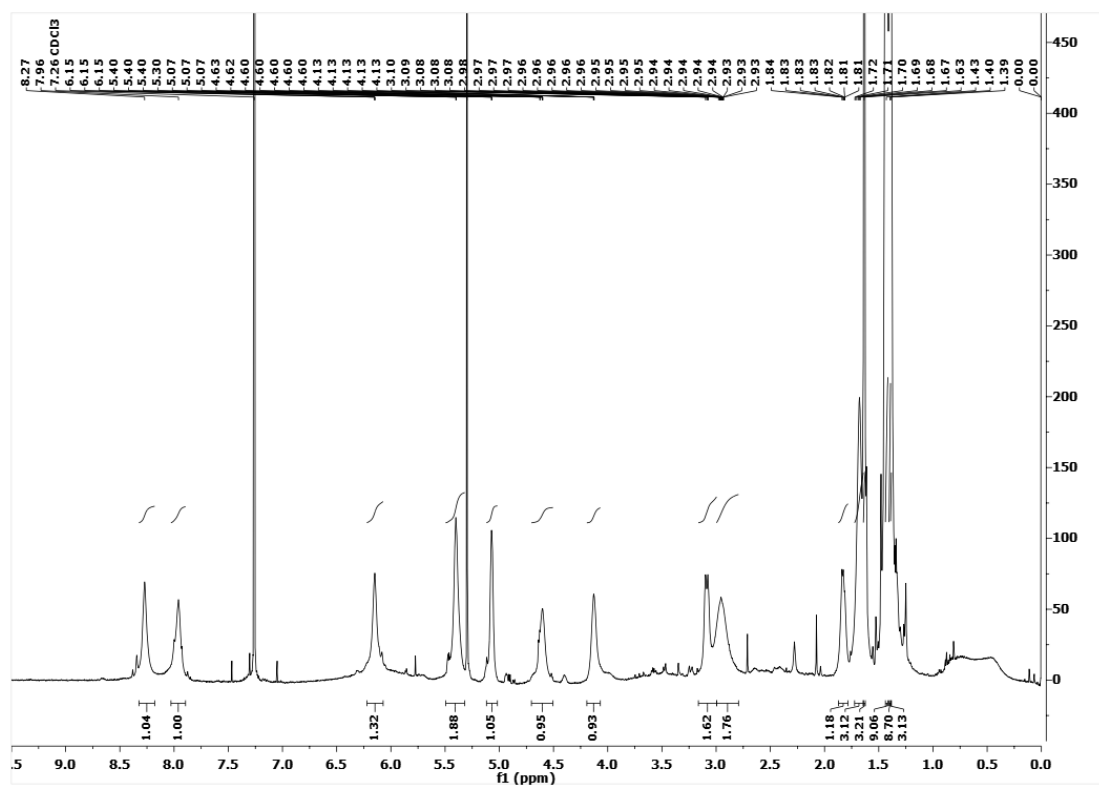

### HNMR of 6a

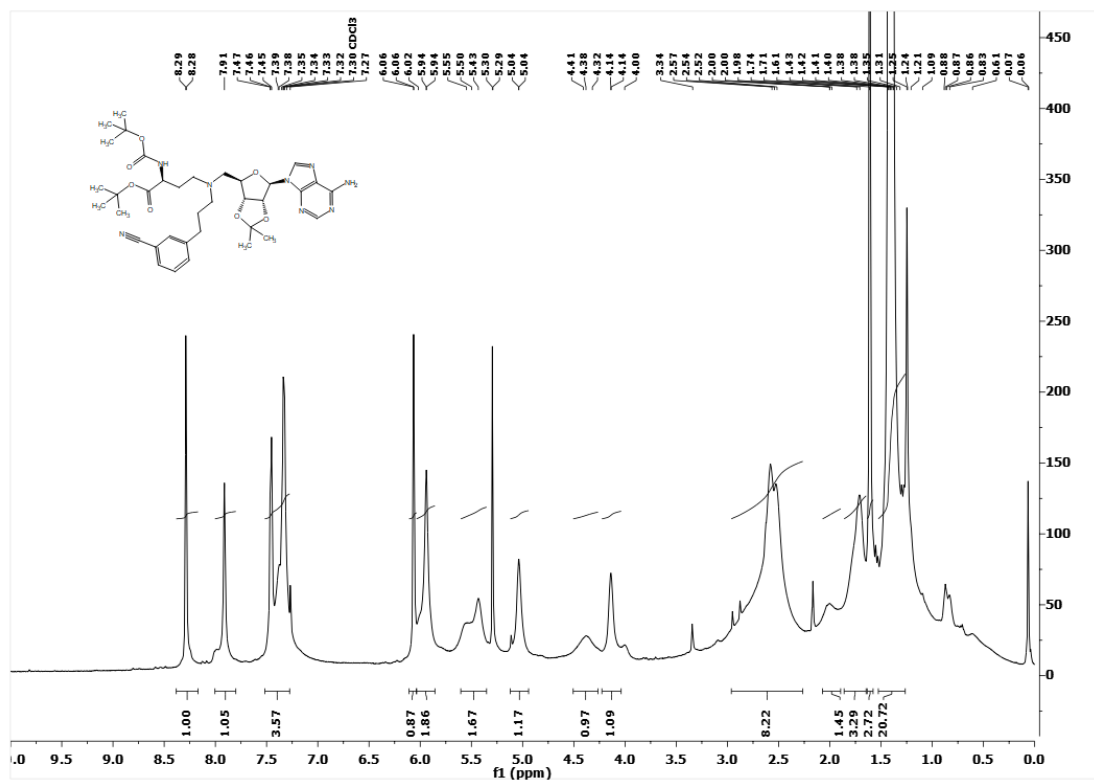

### HNMR of 6b

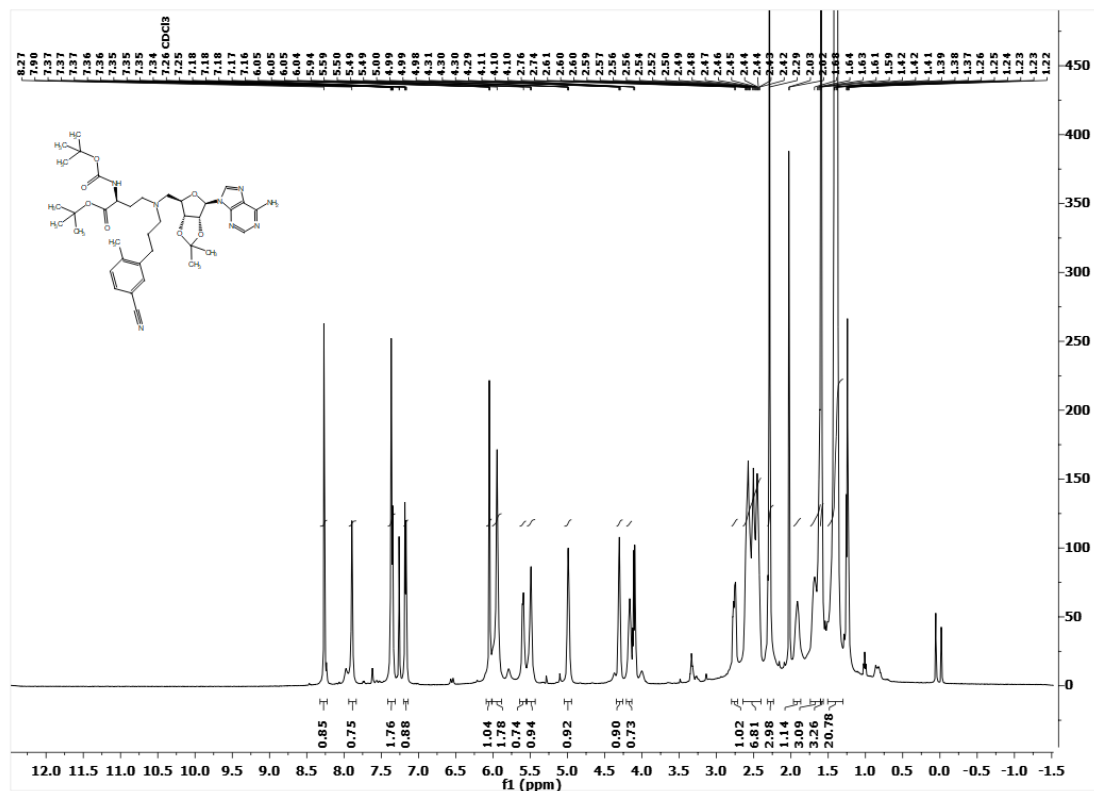

### HNMR of 6c

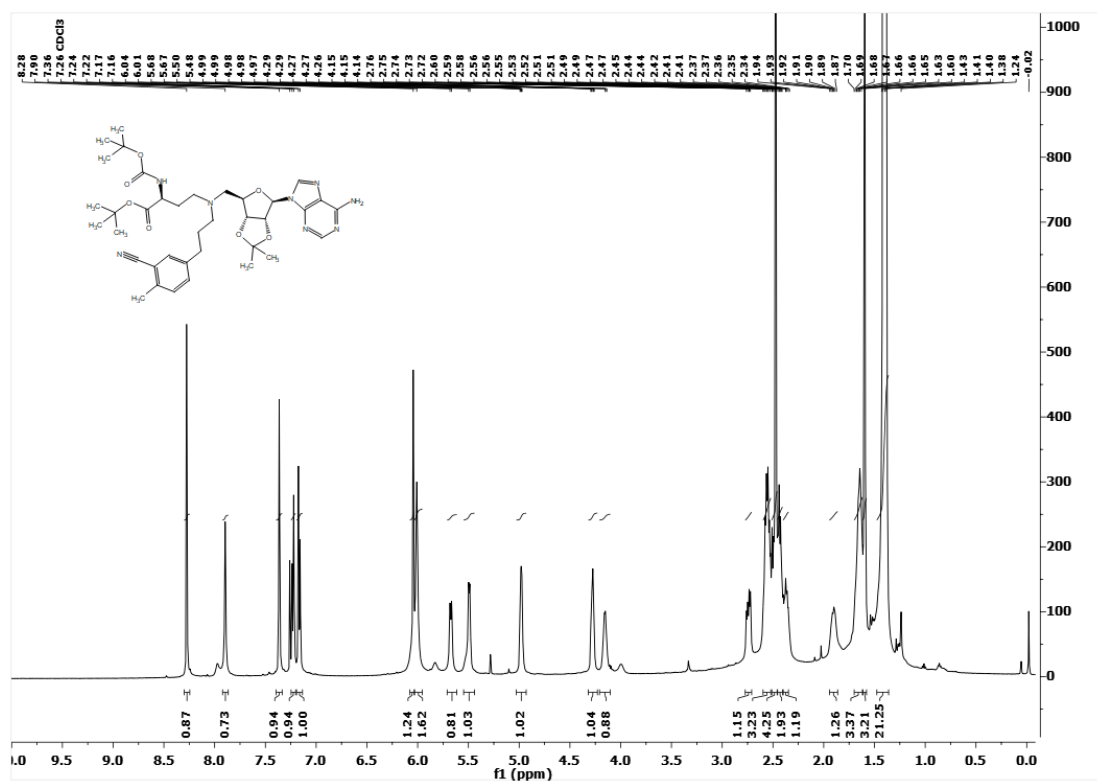

### HNMR of 6d

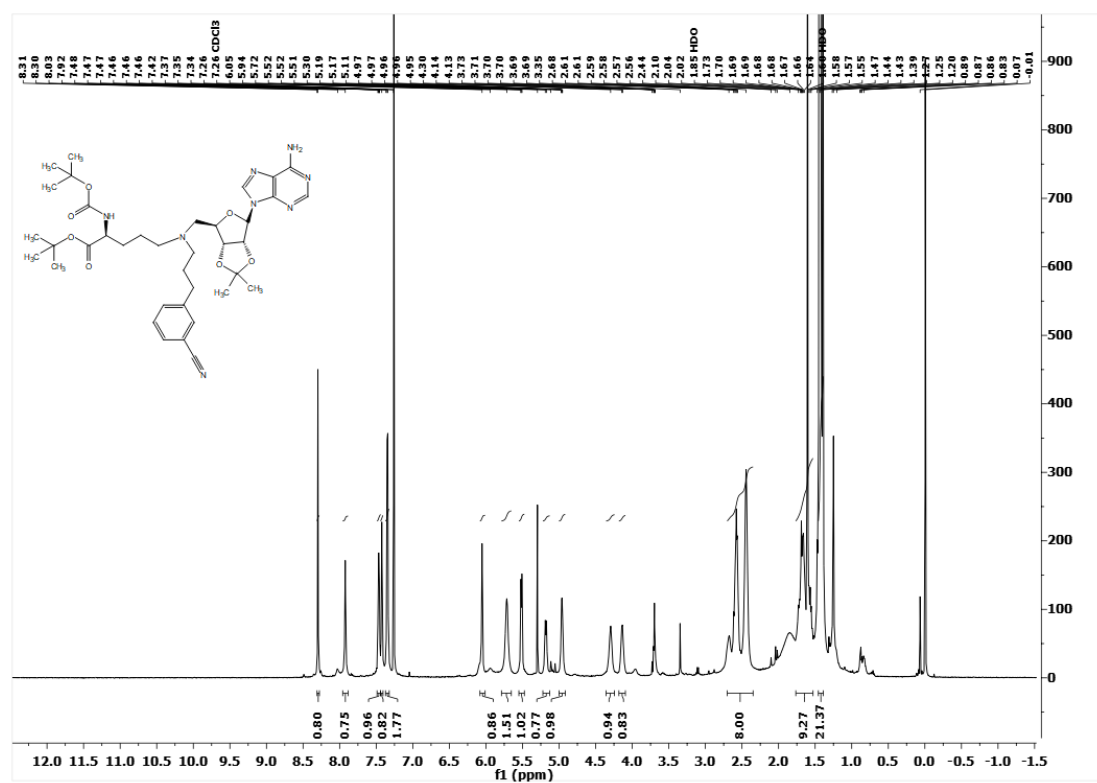



### HNMR of 6g

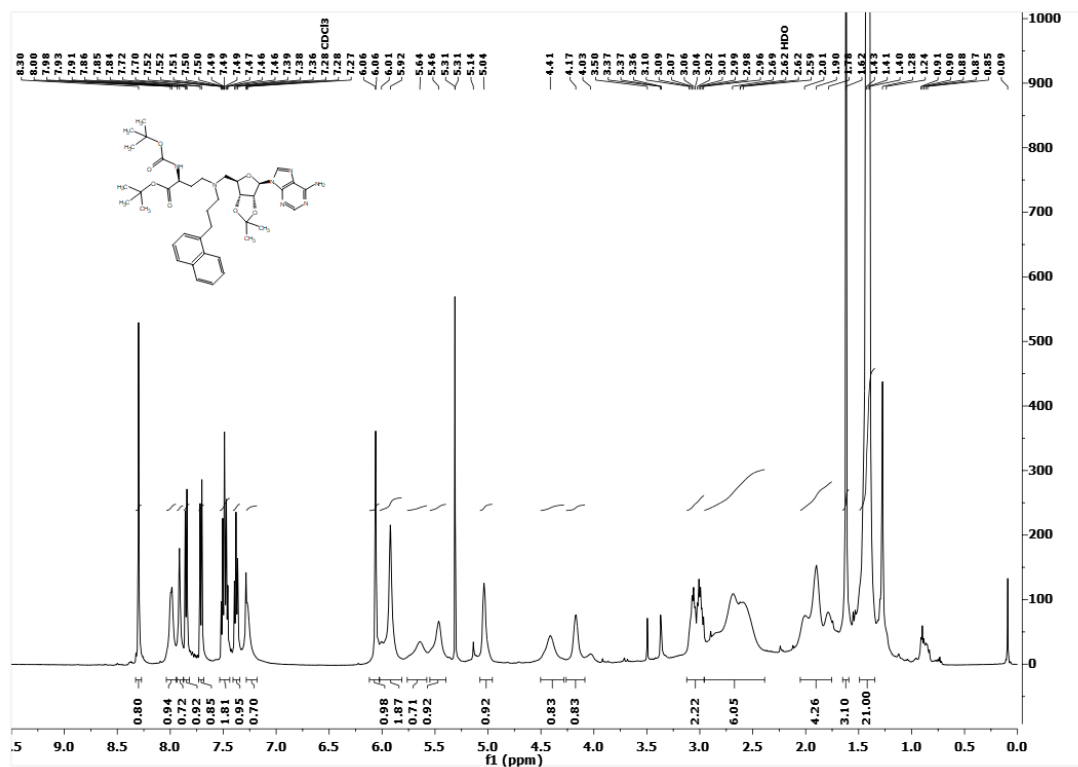

### HNMR of 6h

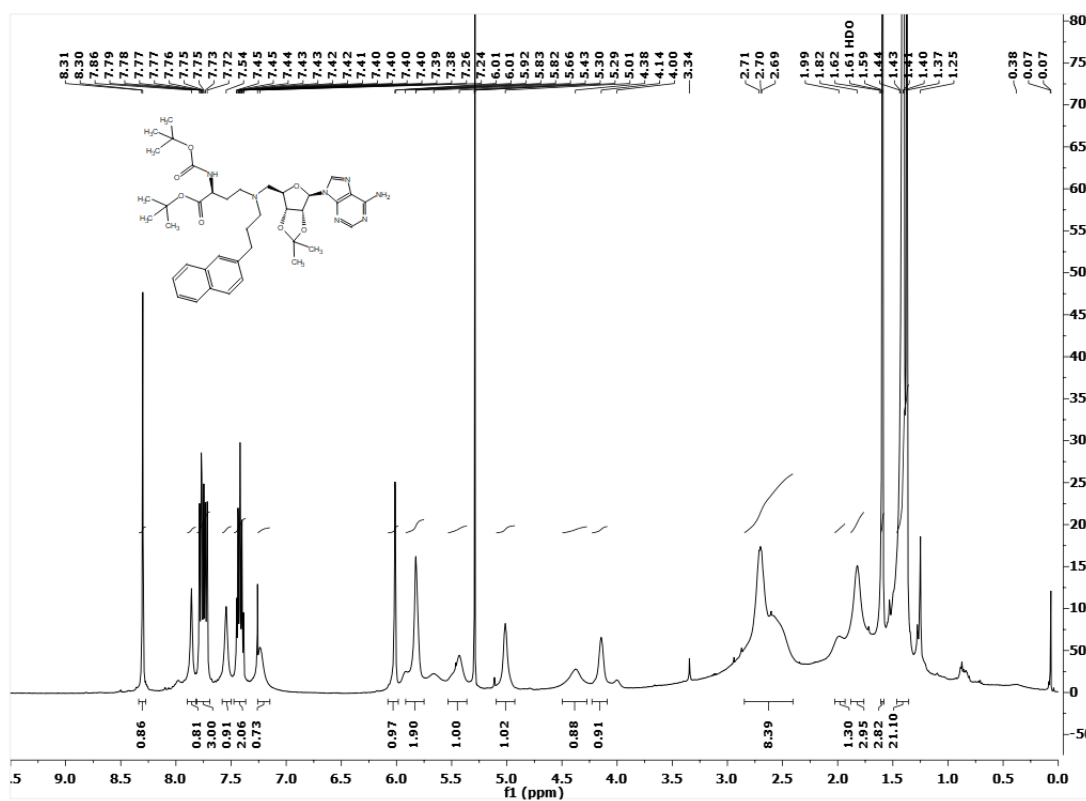



### HNMR of 6i

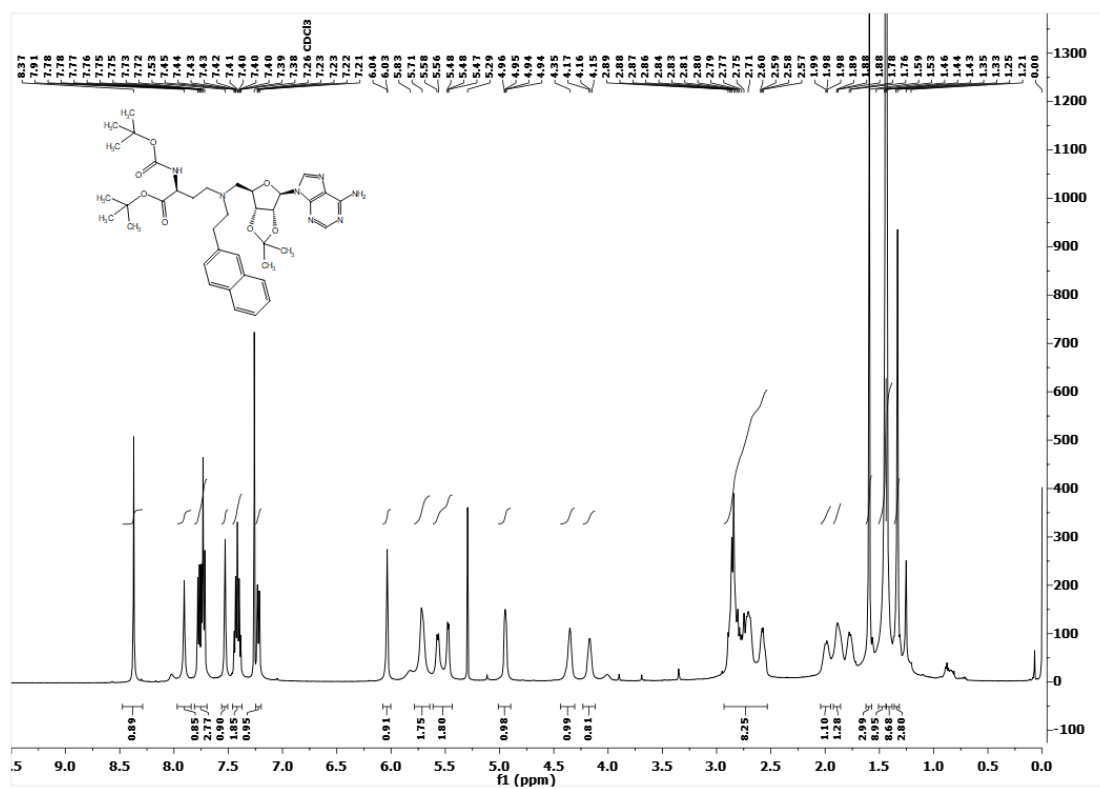

### HNMR of 9a

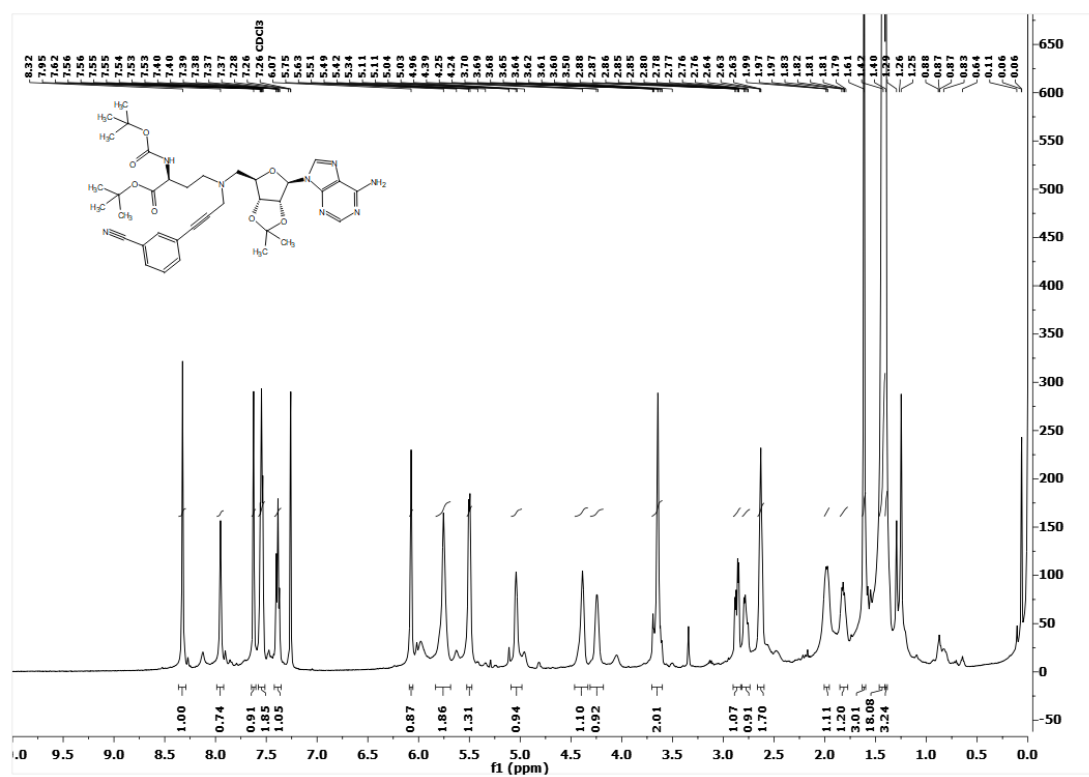

### HNMR of 9b

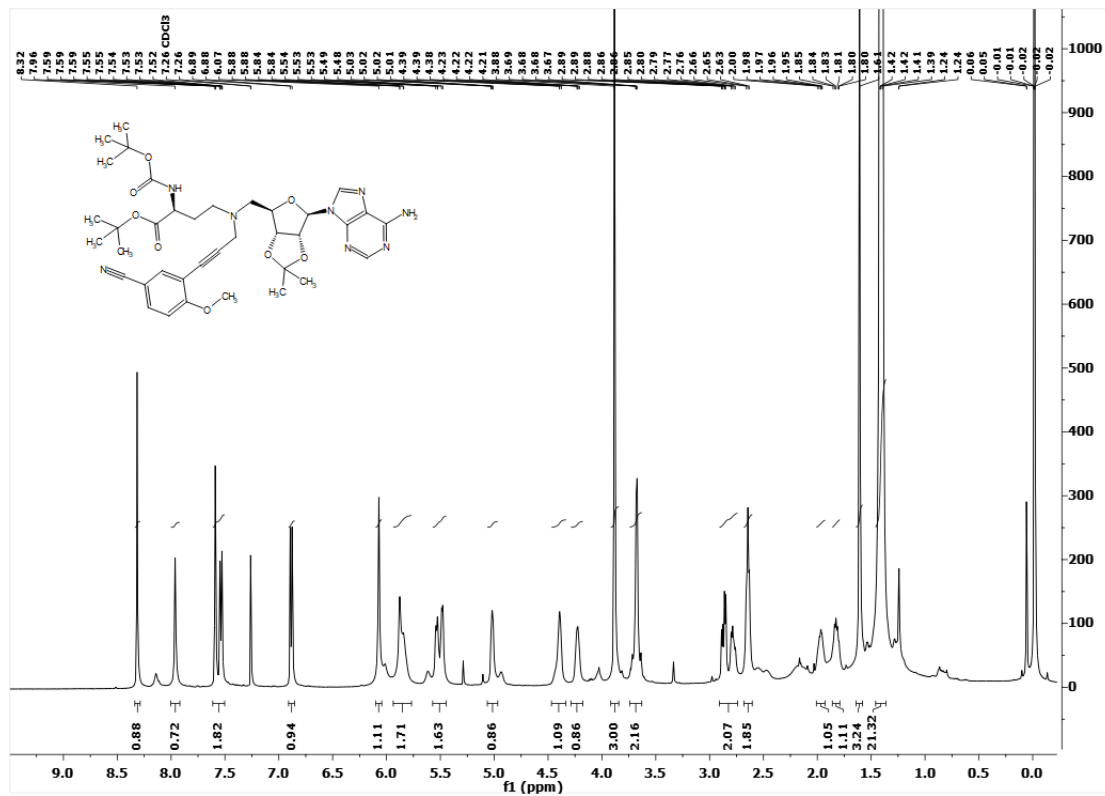

### HNMR of 9c

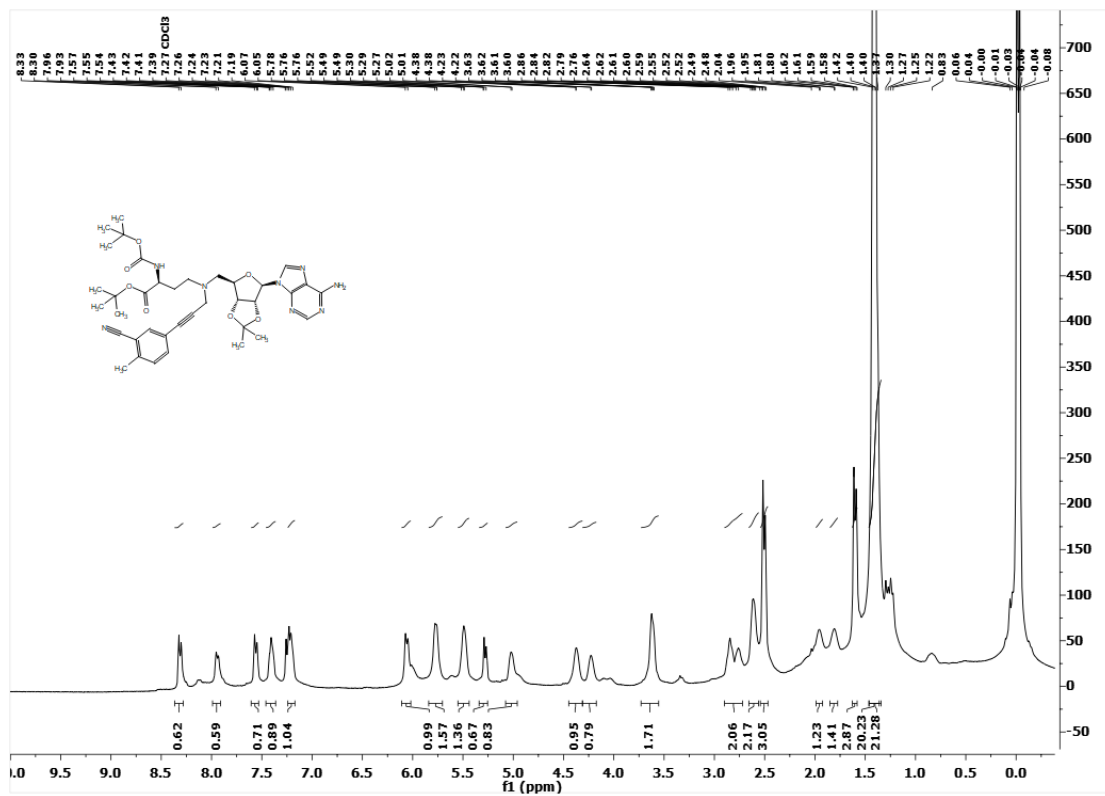

# HNMR of 9d

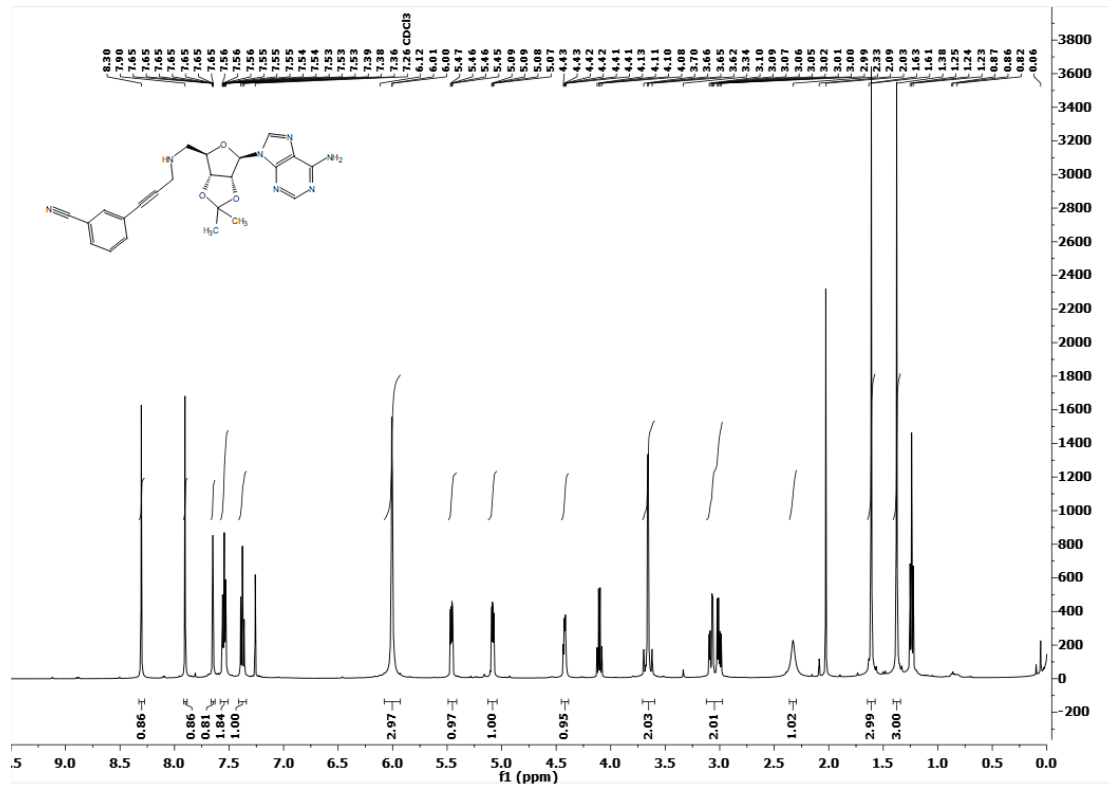

# HNMR of 12a

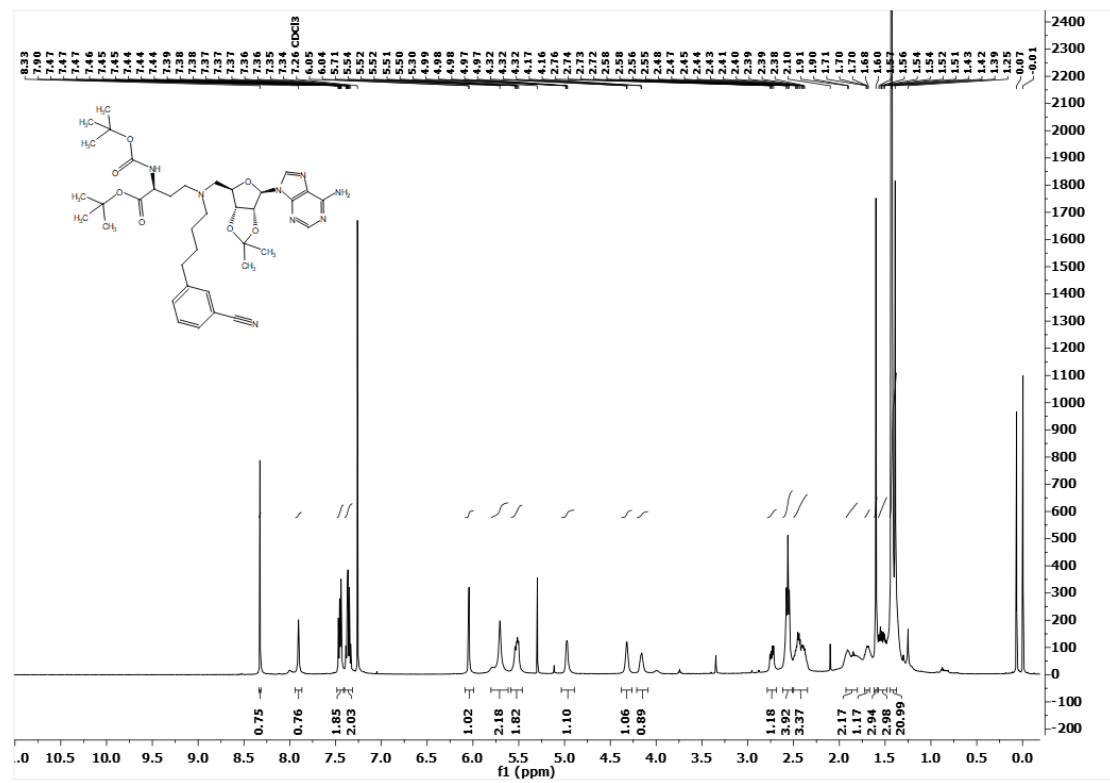

# HNMR of 12b

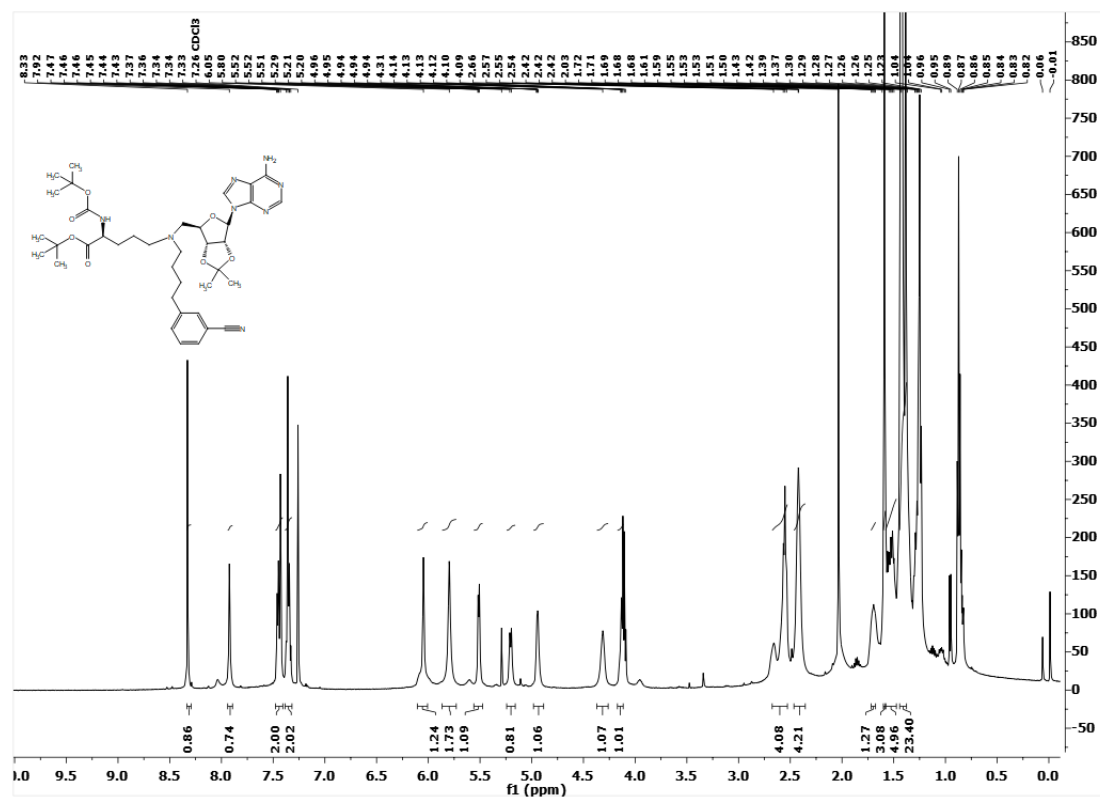

NMR, MALDI-MS and HPLC spectra of compound **1a-j**, **1a\***, **2a-d**, **2a\*** and **3a-b**

NMR, MALDI-MS and HPLC spectra of compound **1a**

### **HNMR**

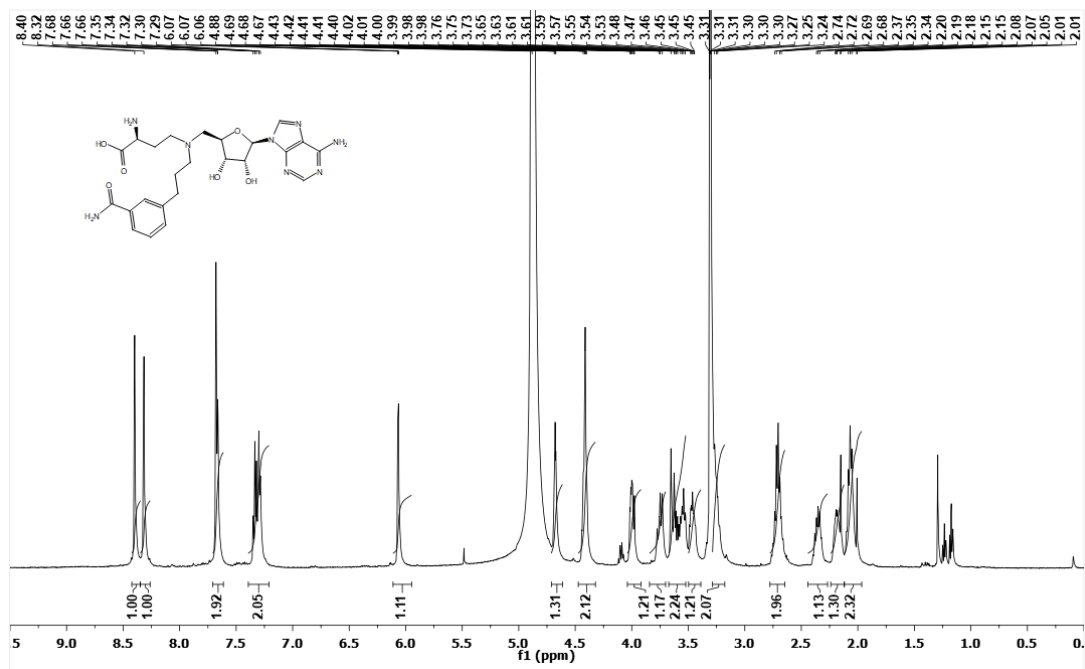

### **CNMR**

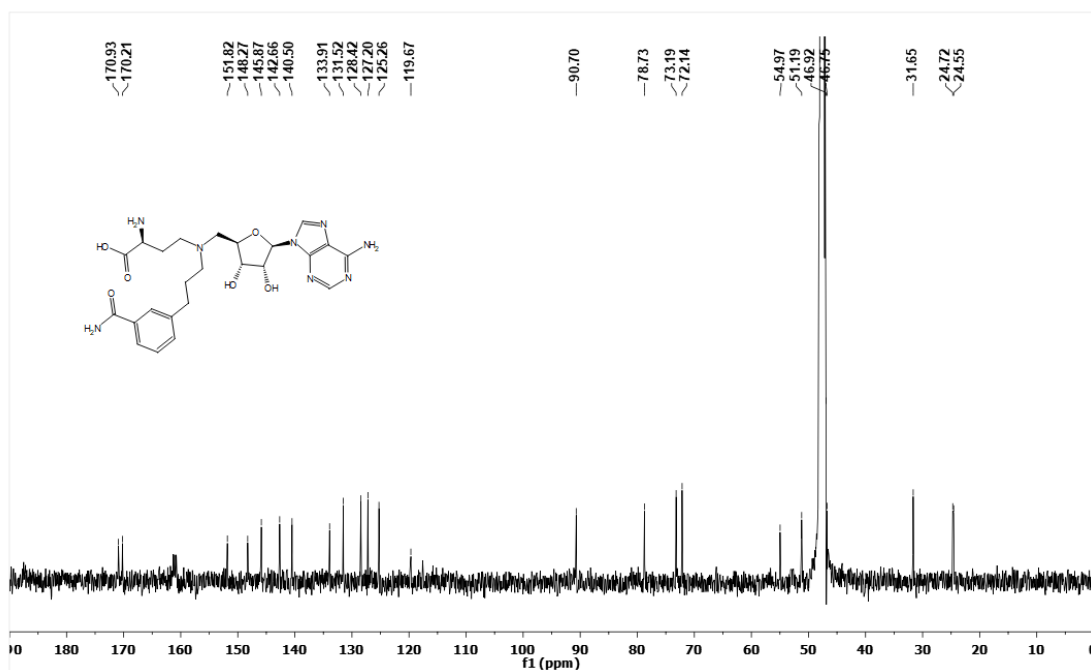

## MALDI-MS

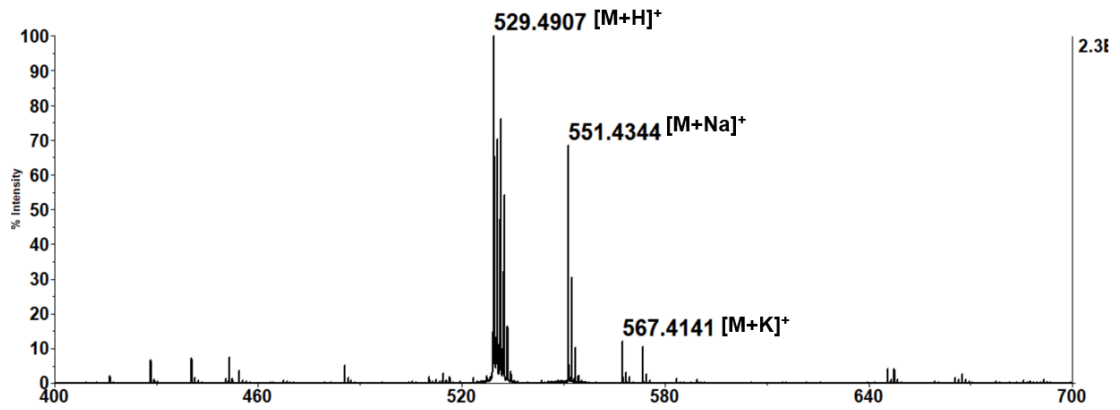

## HPLC

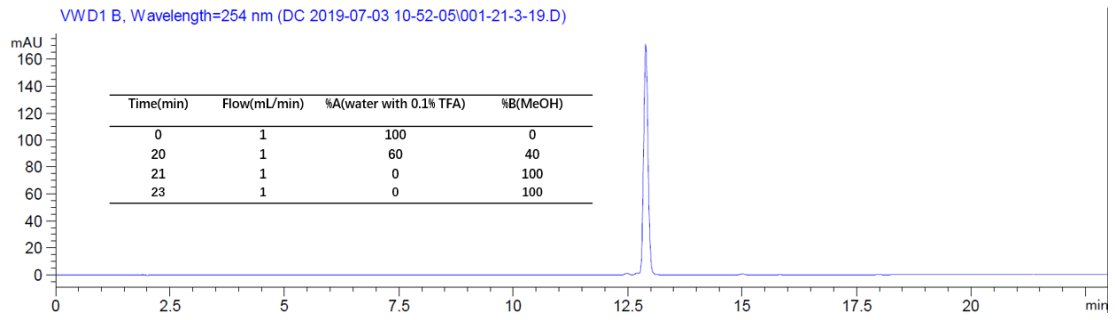

NMR, MALDI-MS and HPLC spectra of compound **1a**\*

H-NMR

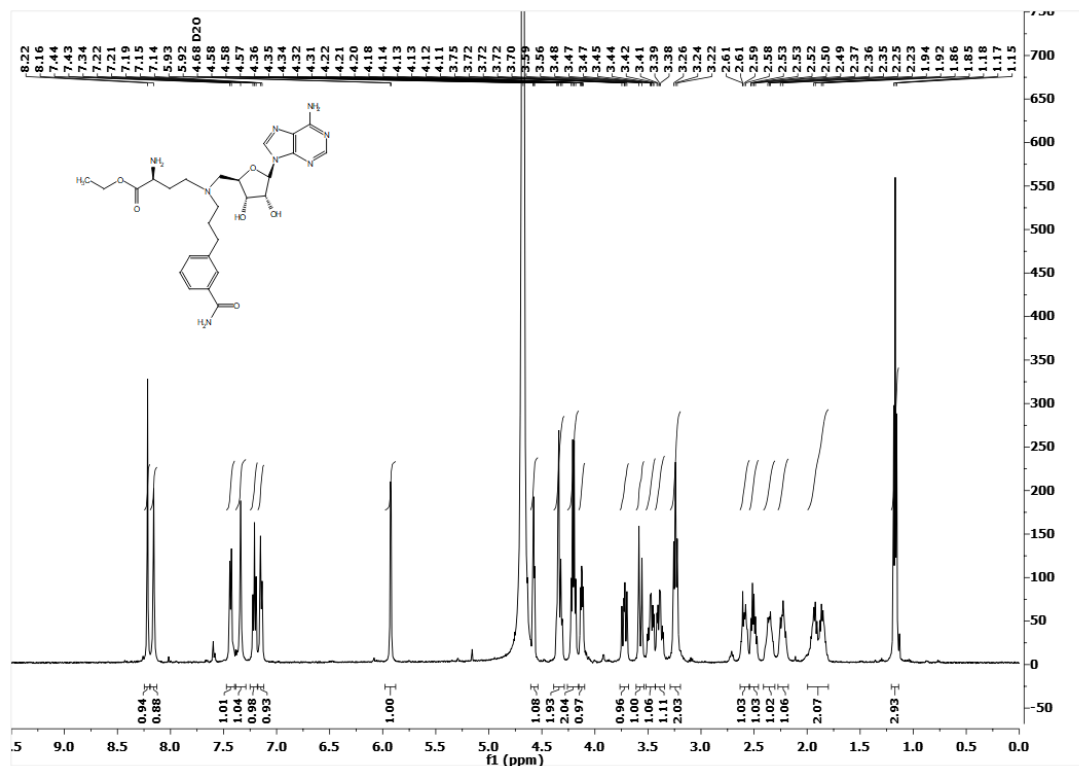

MALDI-MS

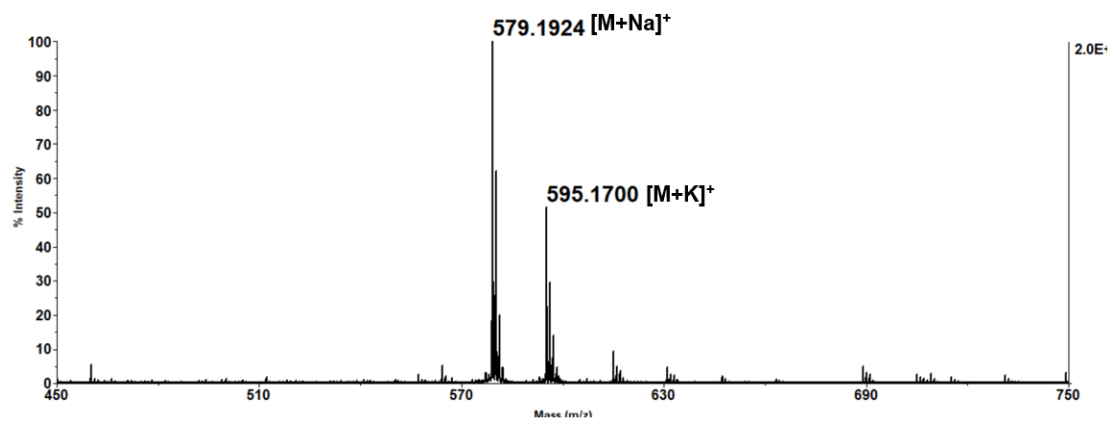

HPLC

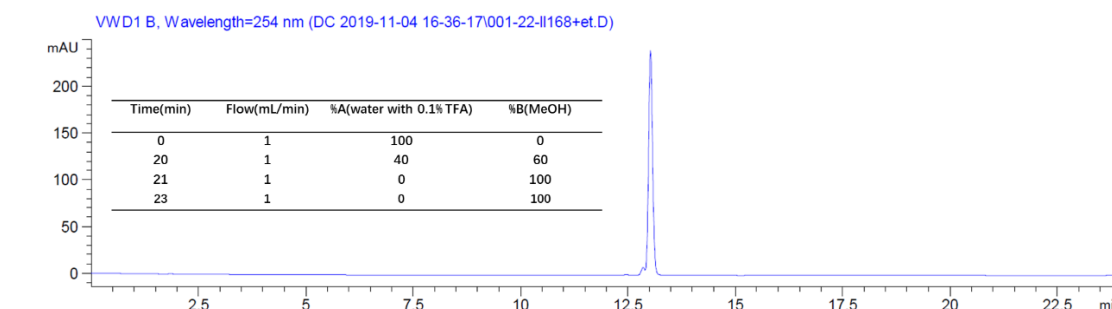

NMR, MALDI-MS and HPLC spectra of compound **1b**

HNMR

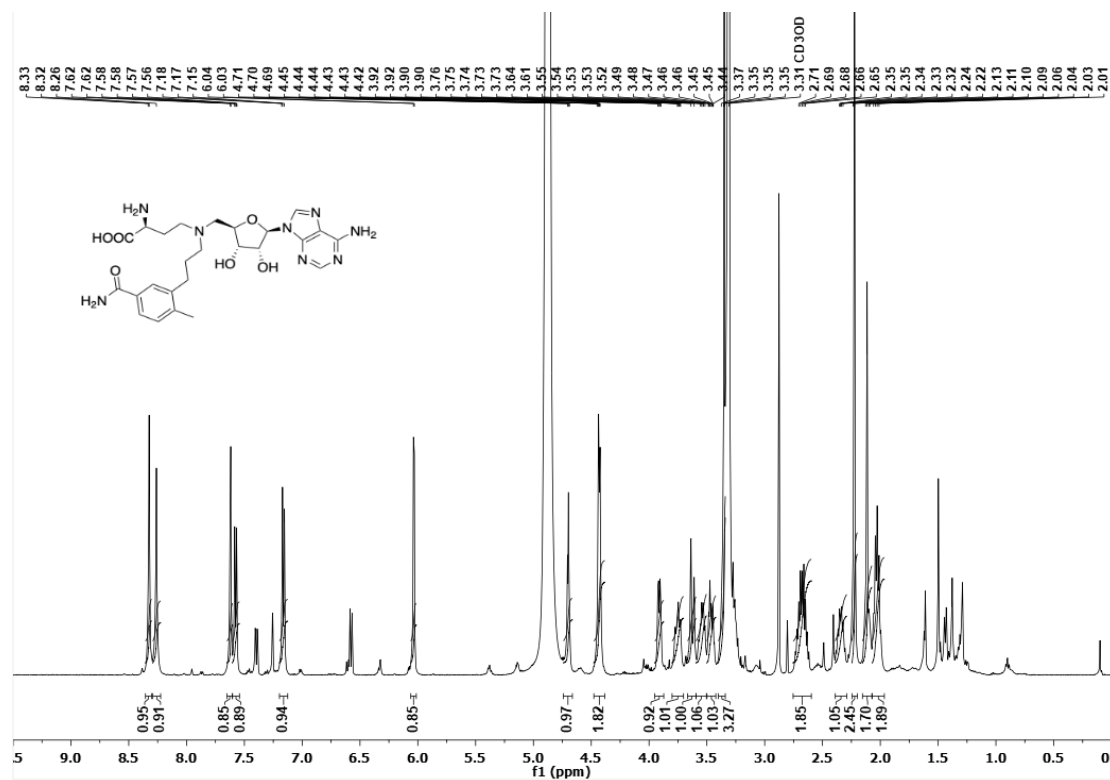

CNMR

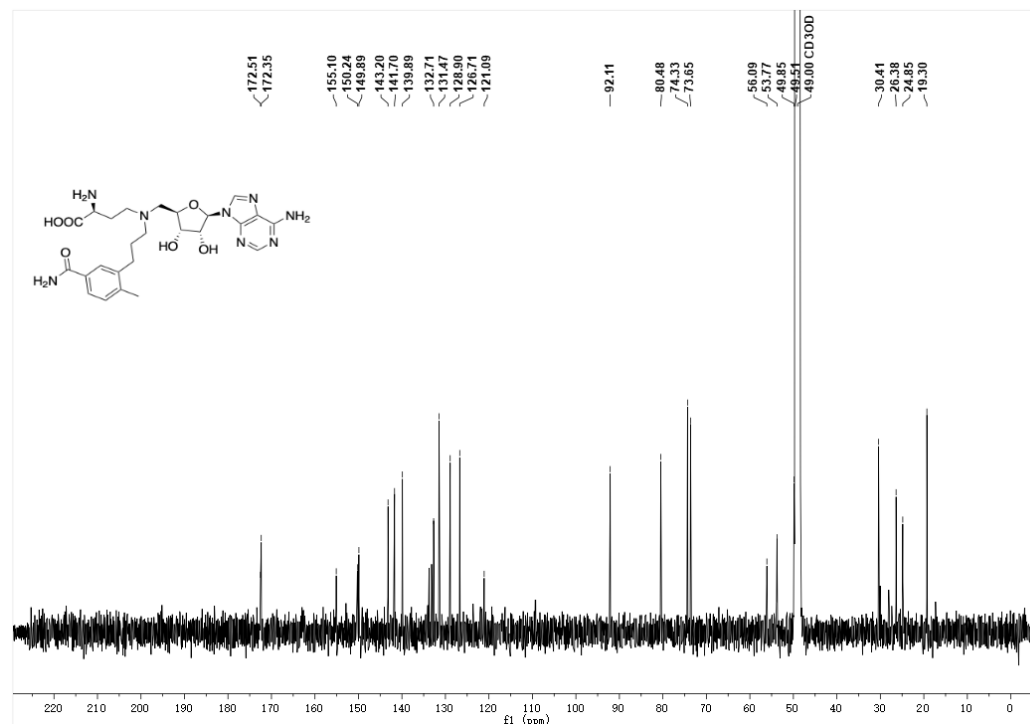



### MALDI-MS

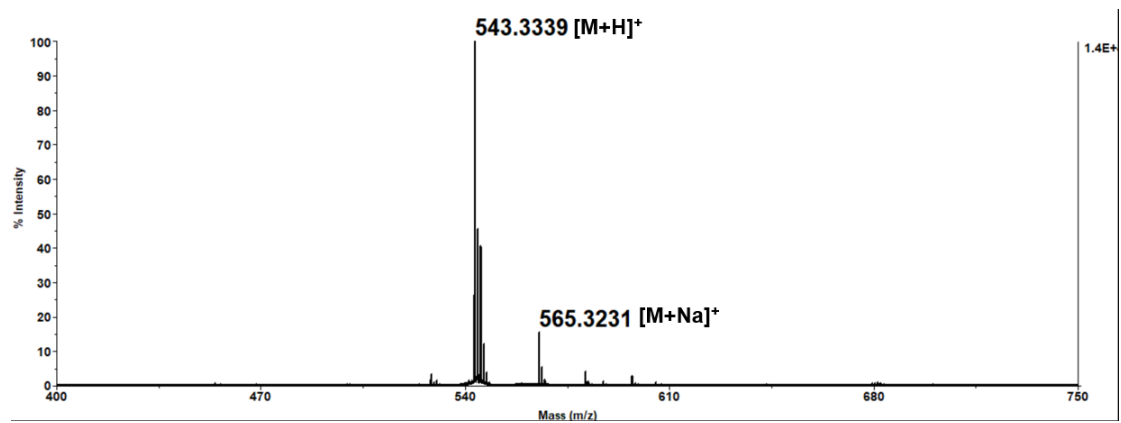

### HPLC

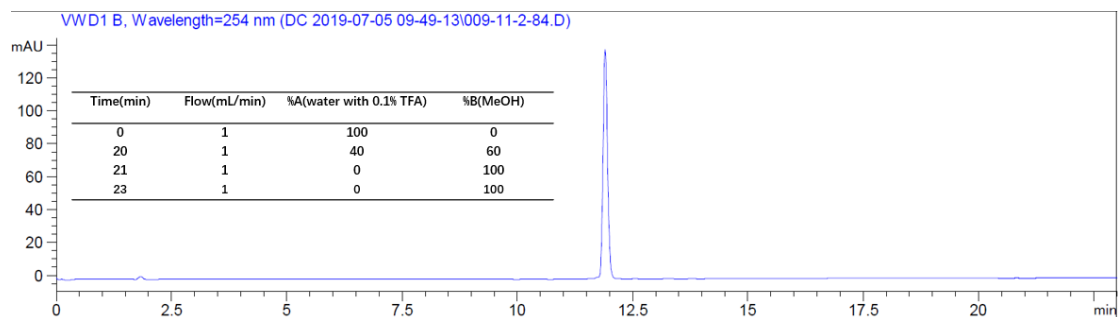

NMR, MALDI-MS and HPLC spectra of compound **1c**

HNMR

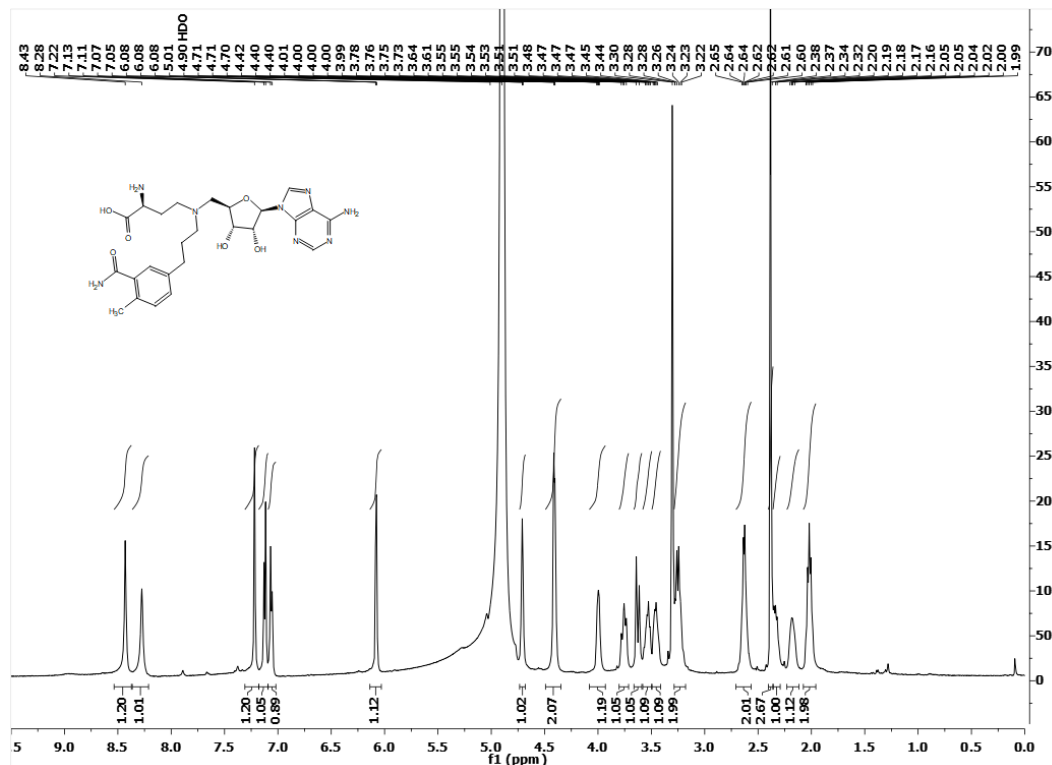

CNMR

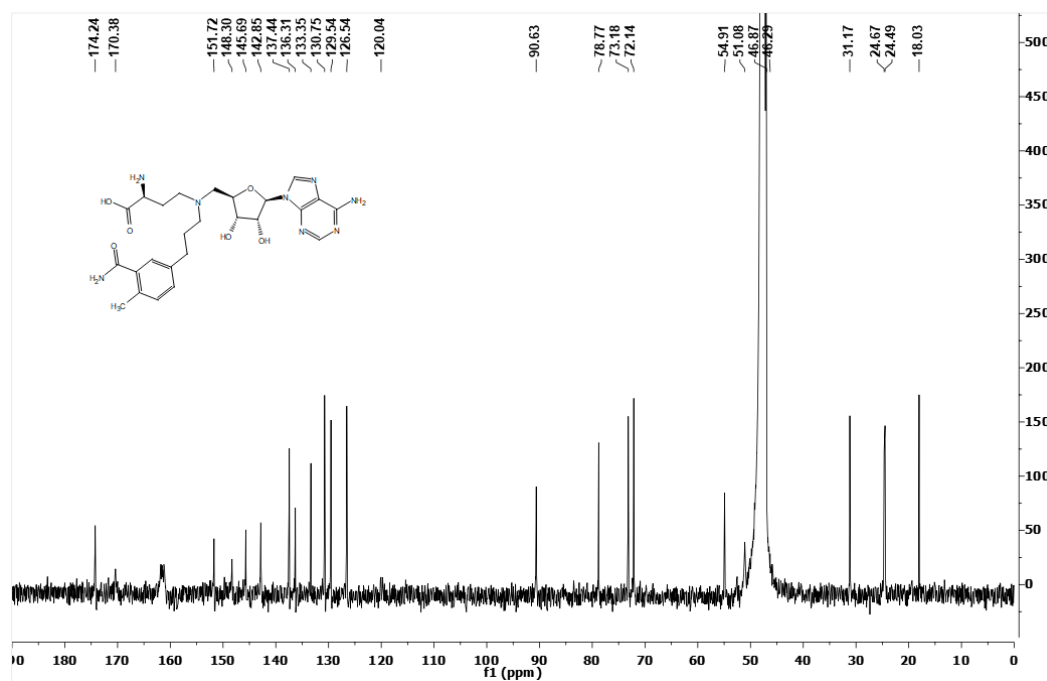

## MALDI-MS

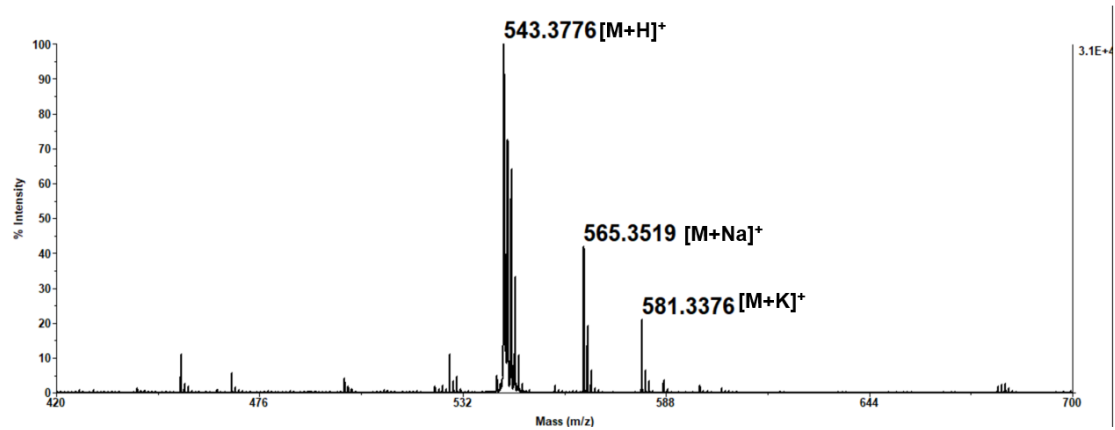

## HPLC

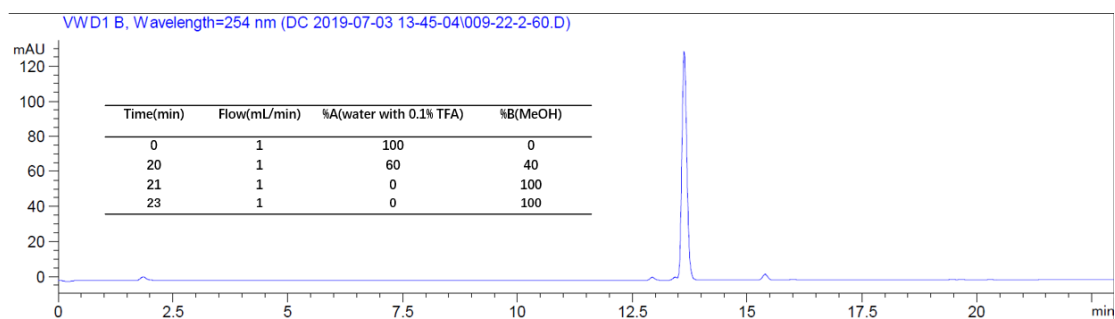

# NMR, MALDI-MS and HPLC spectra of compound 1d

## HNMR

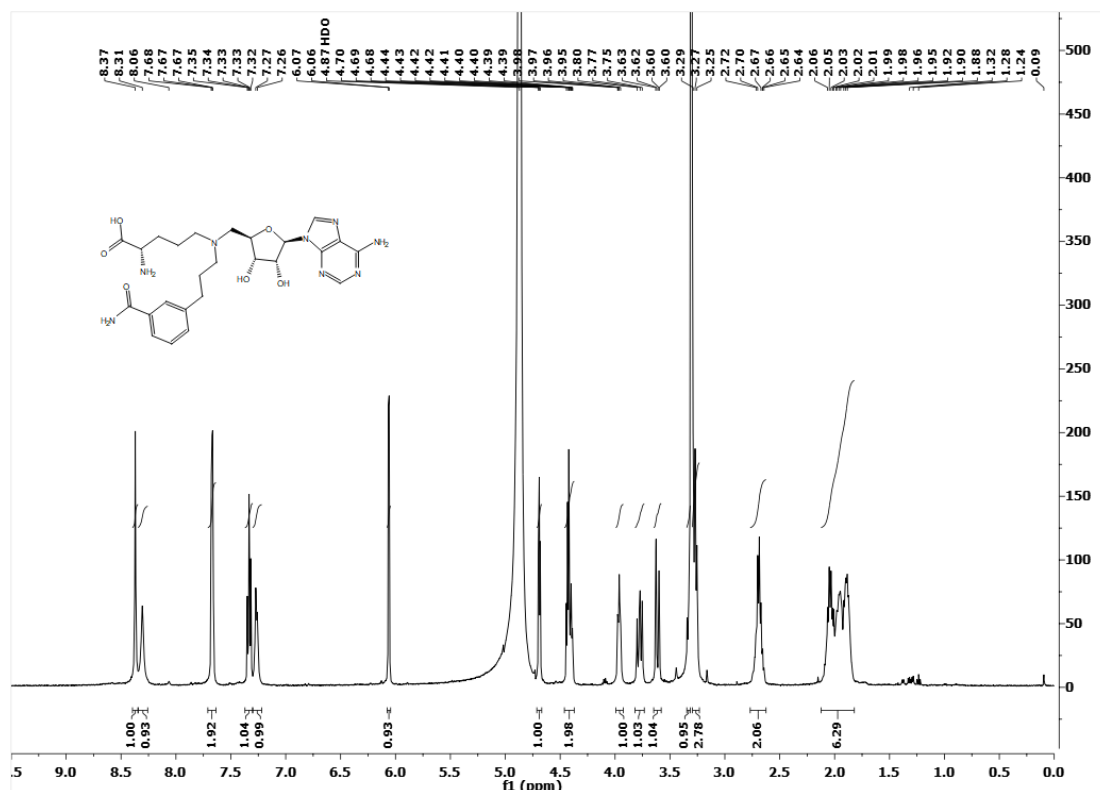

## MALDI-MS

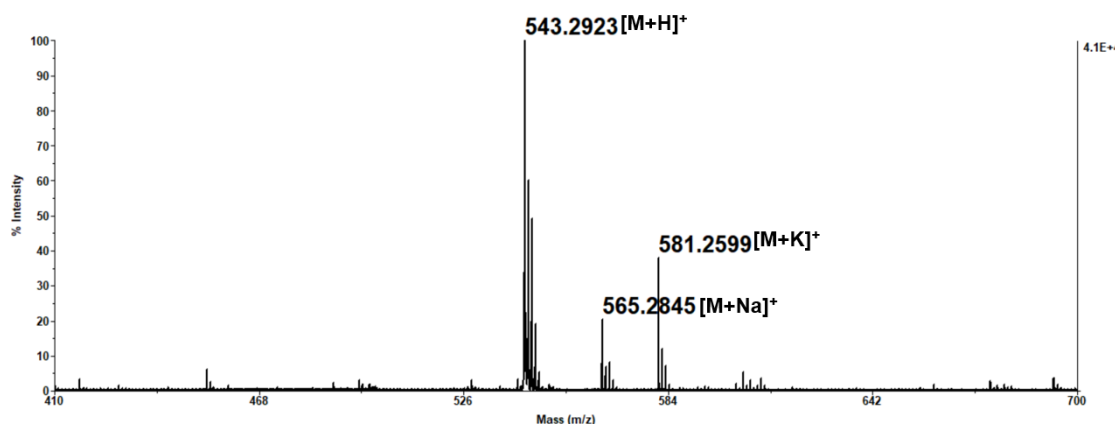

## HPLC

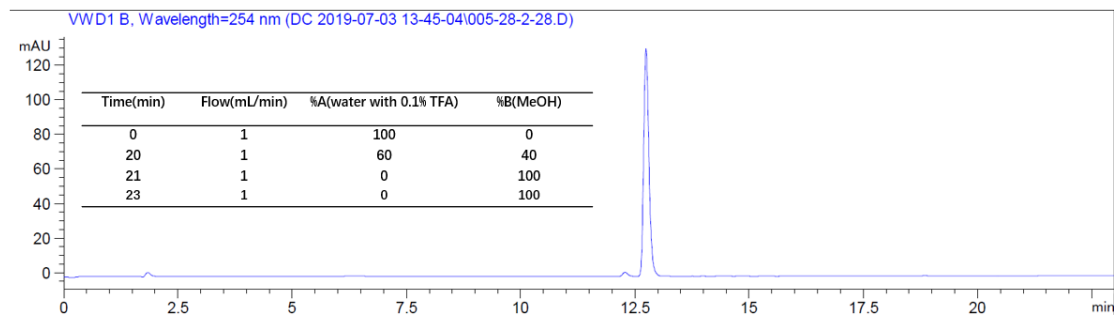

NMR, MALDI-MS and HPLC spectra of compound 1e

<sup>1</sup>H NMR

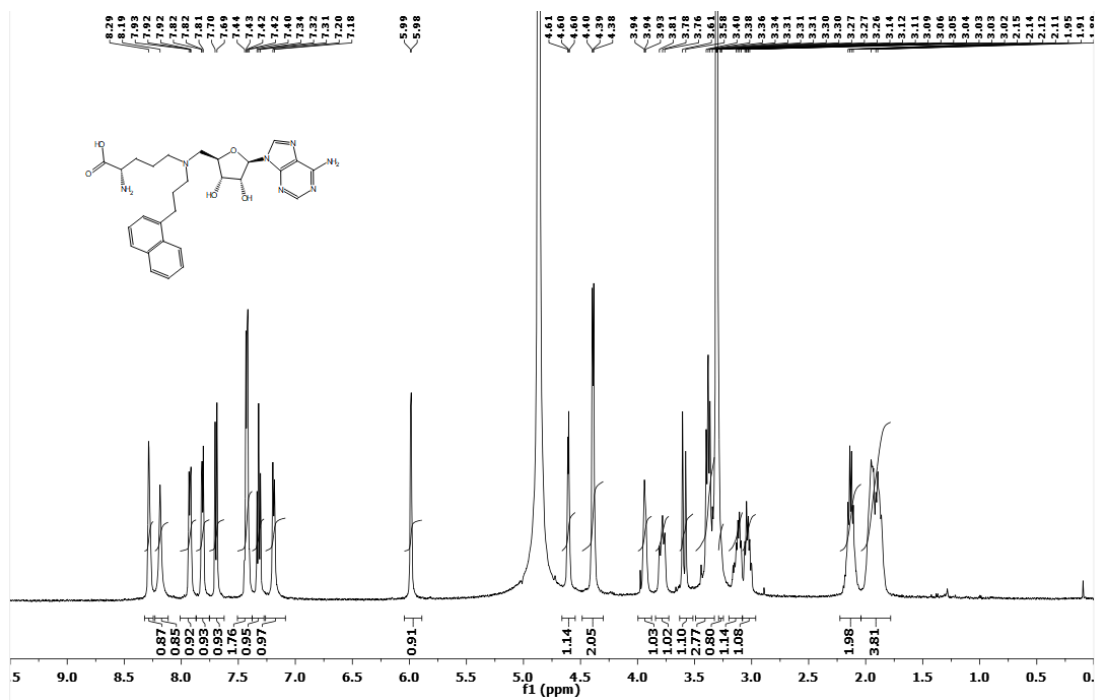

<sup>13</sup>C NMR

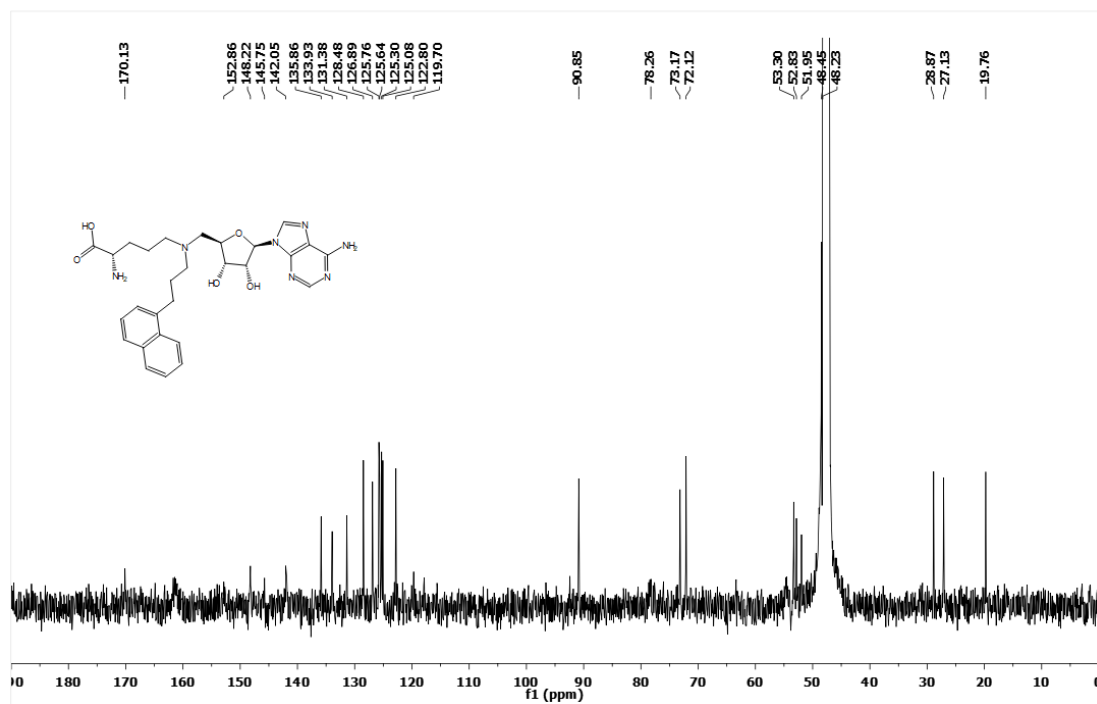

# MALDI-MS

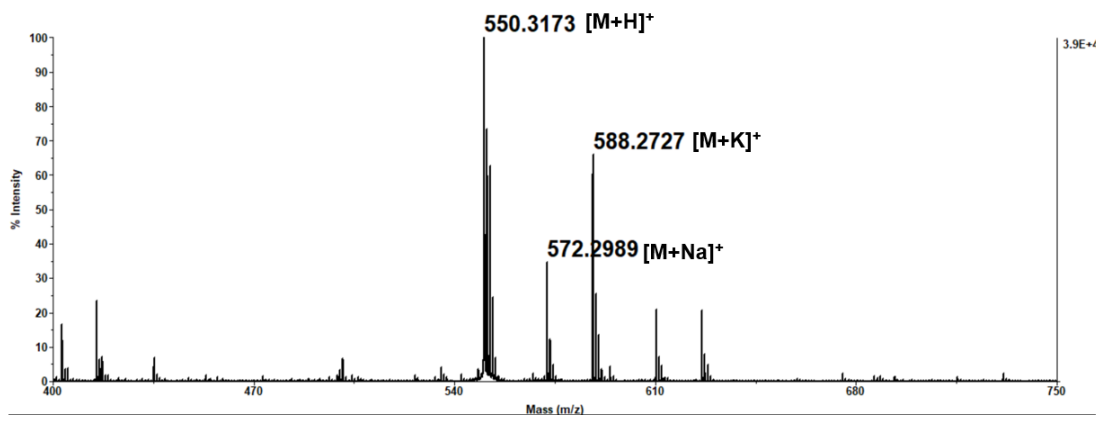

# HPLC

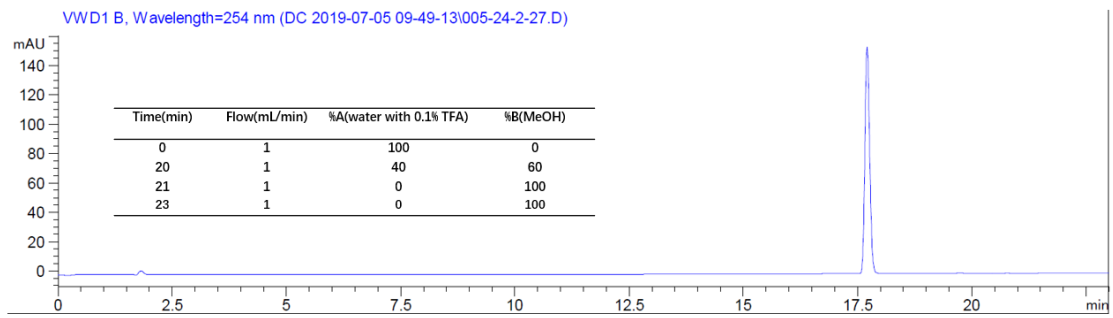

NMR, MALDI-MS and HPLC spectra of compound **1f**

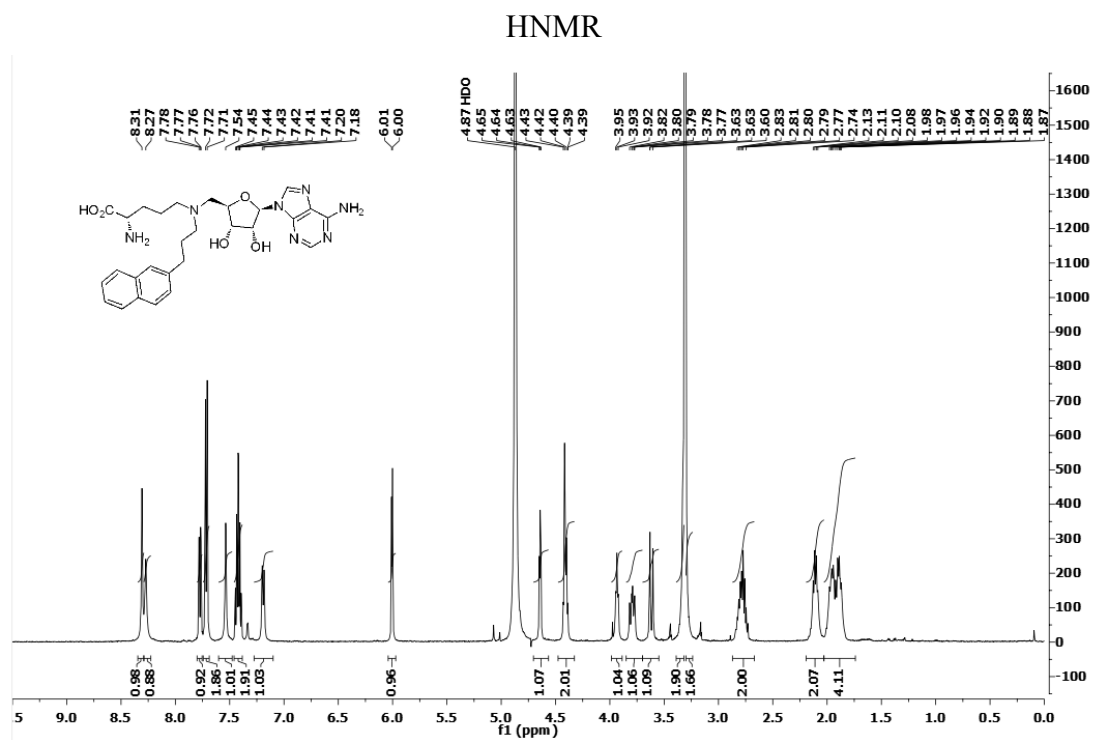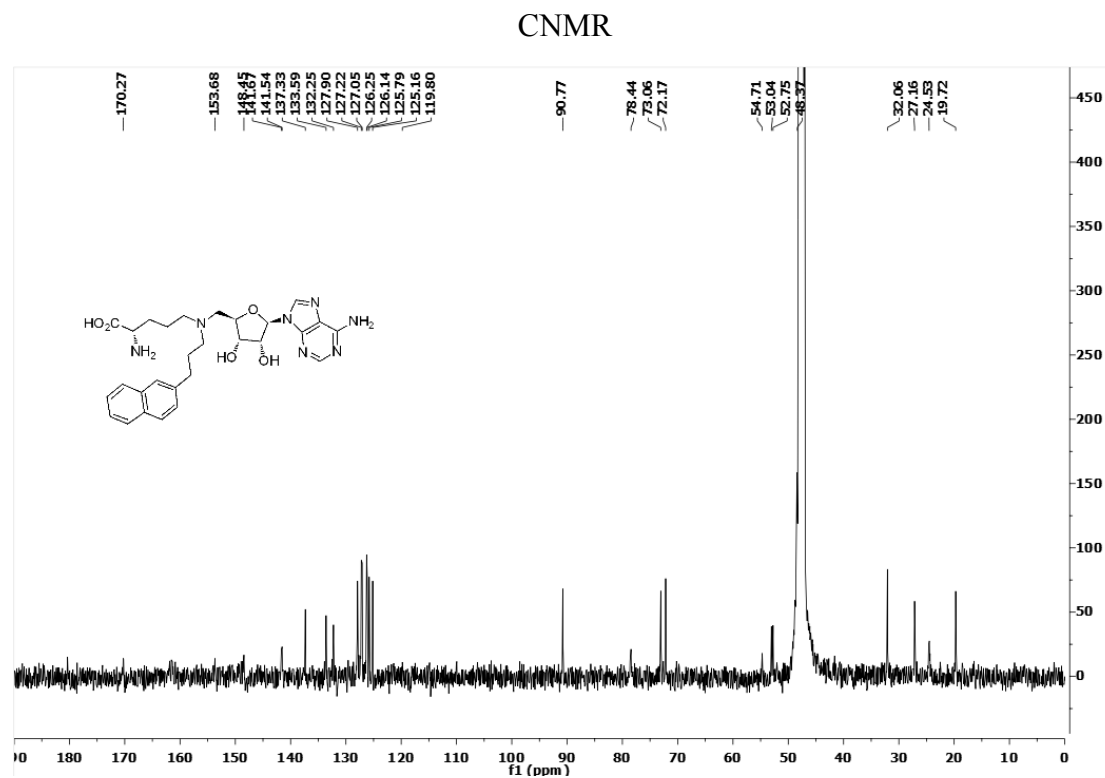

# MALDI-MS

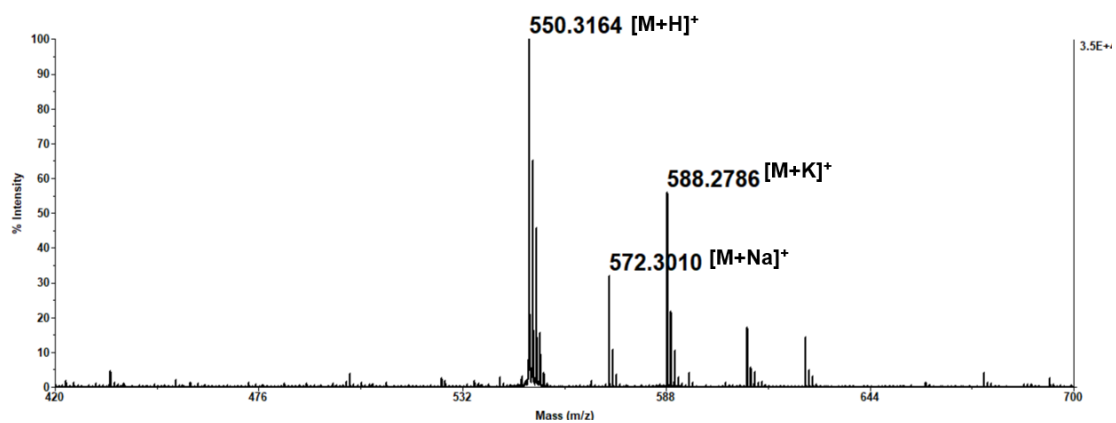

# HPLC

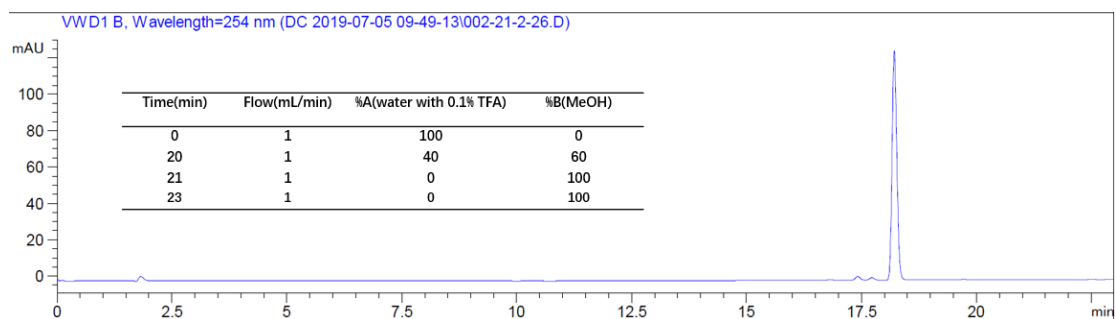



# NMR, MALDI-MS and HPLC spectra of compound **1g**

## HNMR

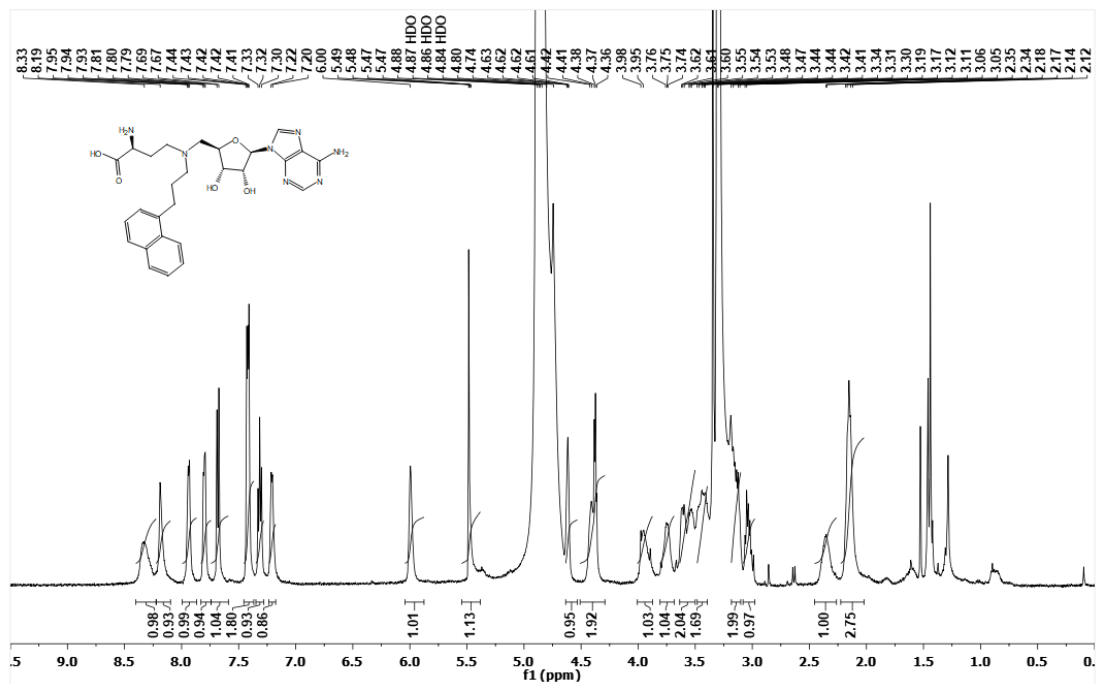

## CNMR

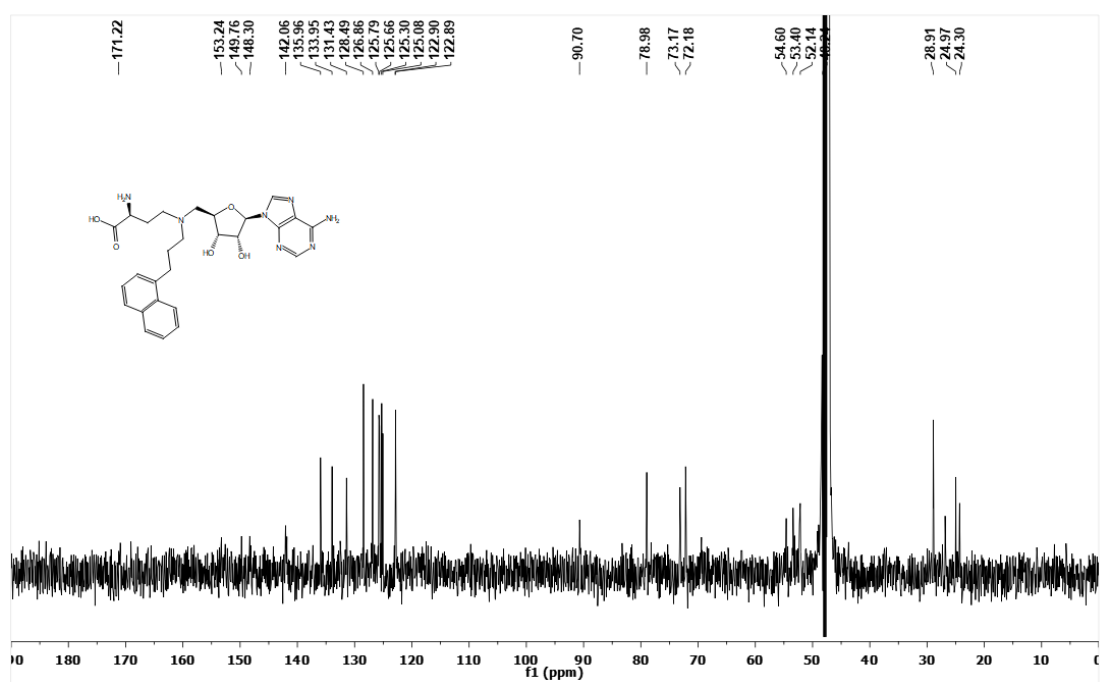

# MALDI-MS

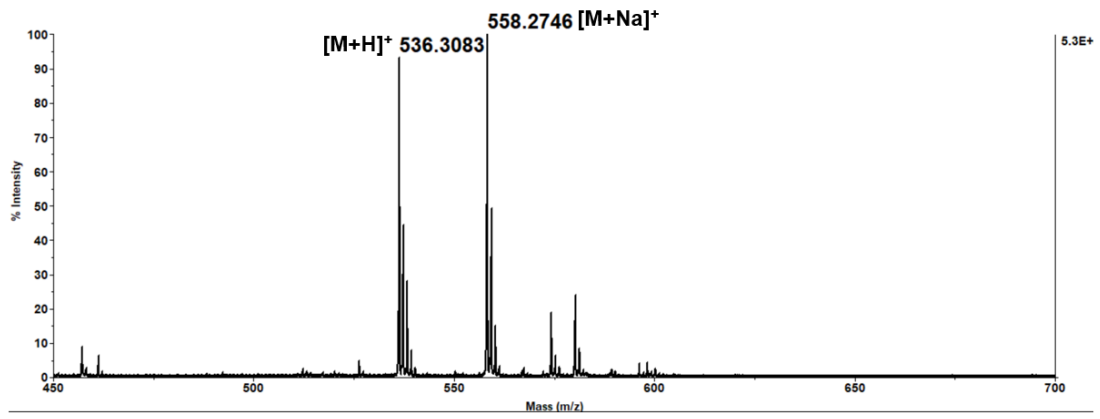

# HPLC

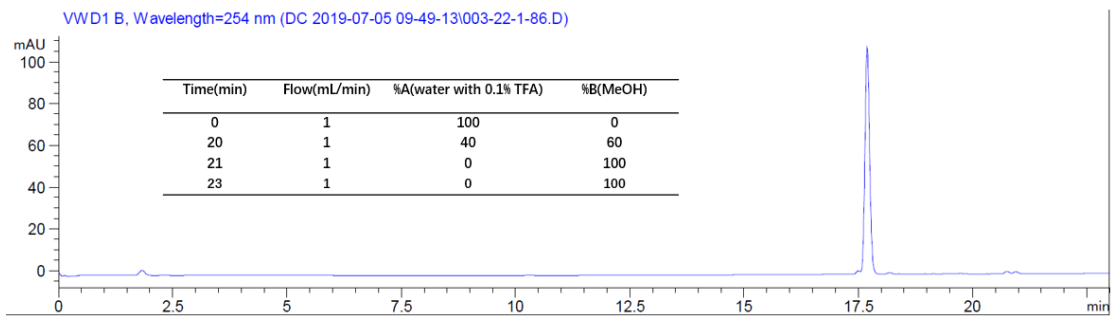

# NMR, MALDI-MS and HPLC spectra of compound 1h

## HNMR

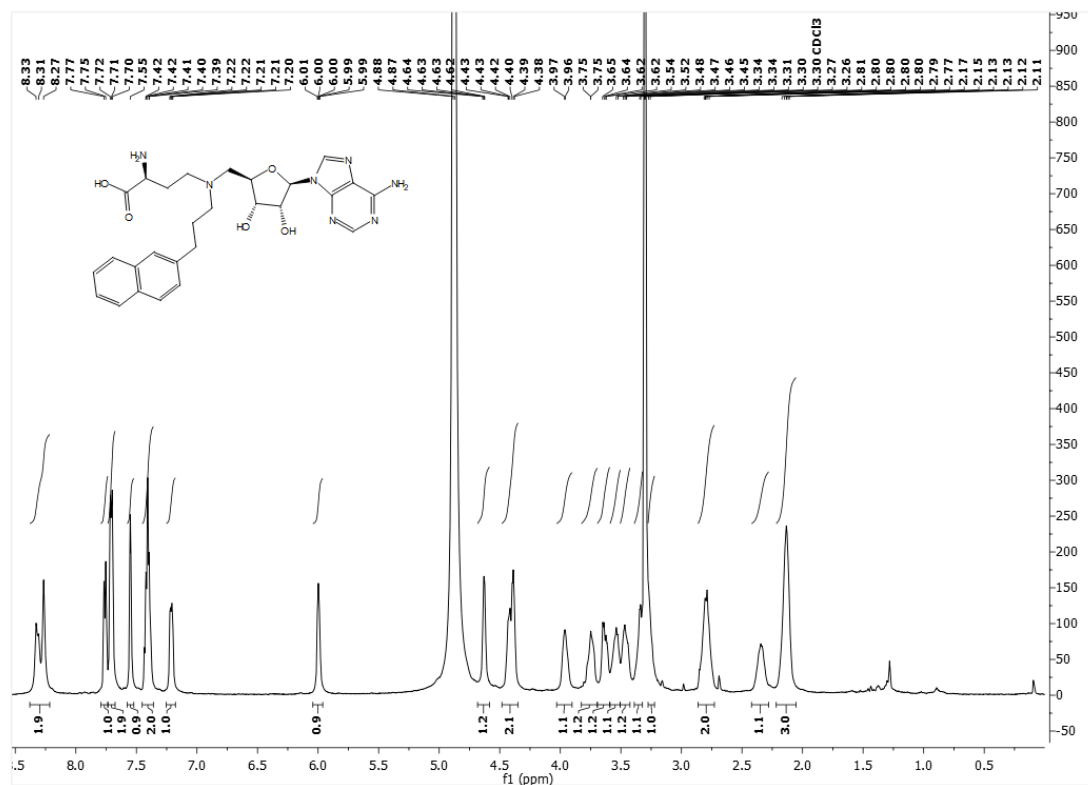

## MALDI-MS

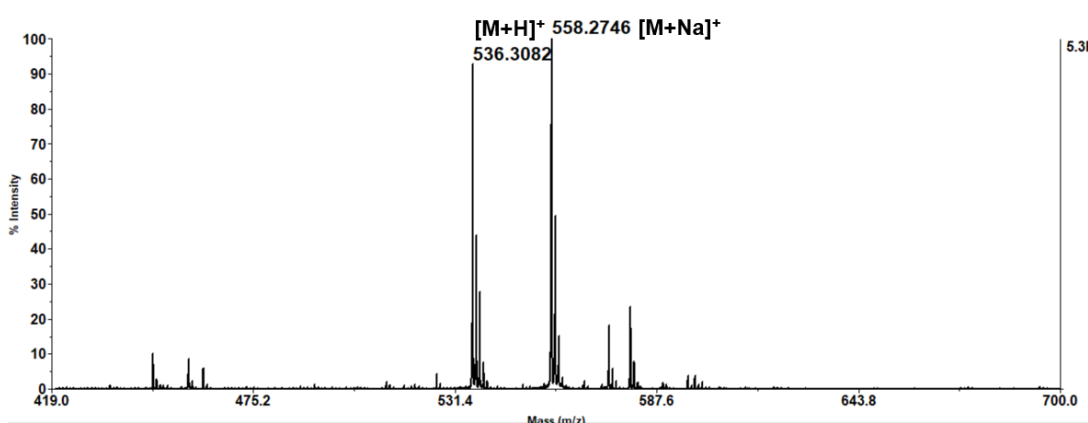

## HPLC

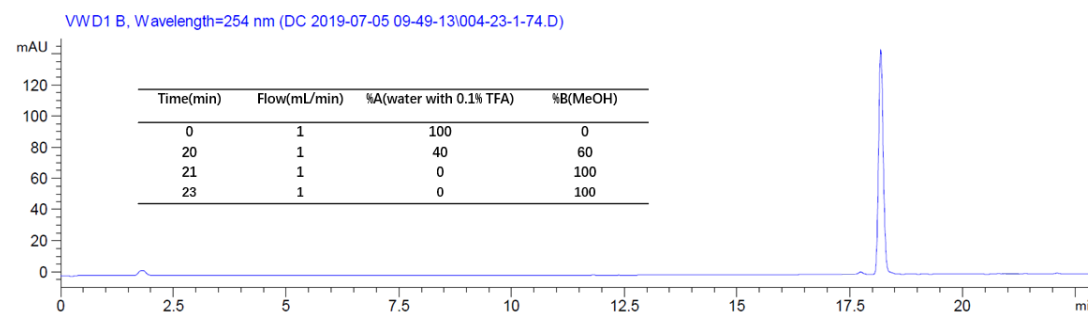

NMR, MALDI-MS and HPLC spectra of compound **1i**

HNMR

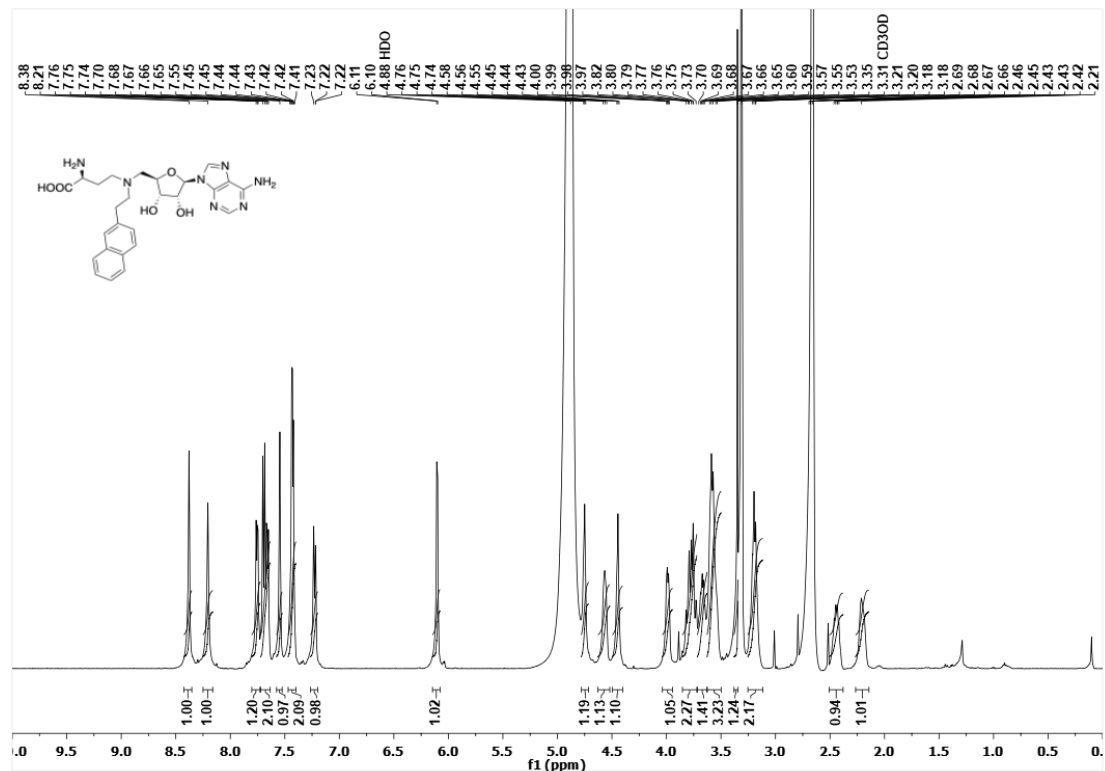

CNMR

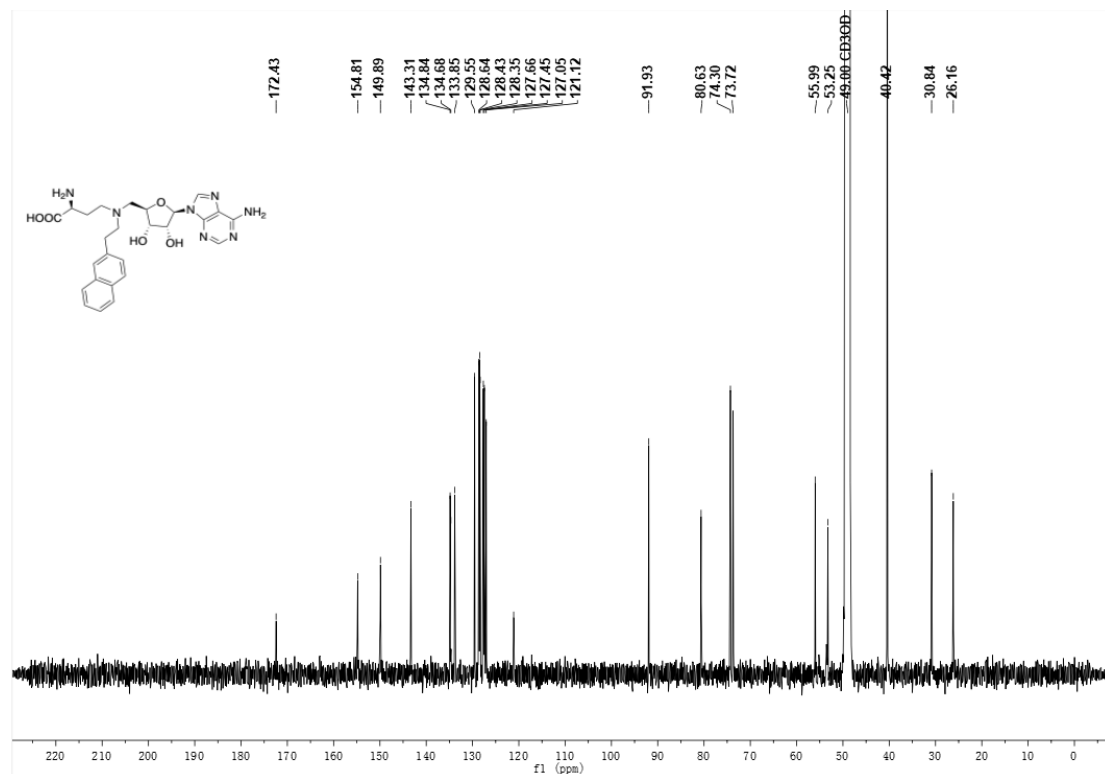

### MALDI-MS

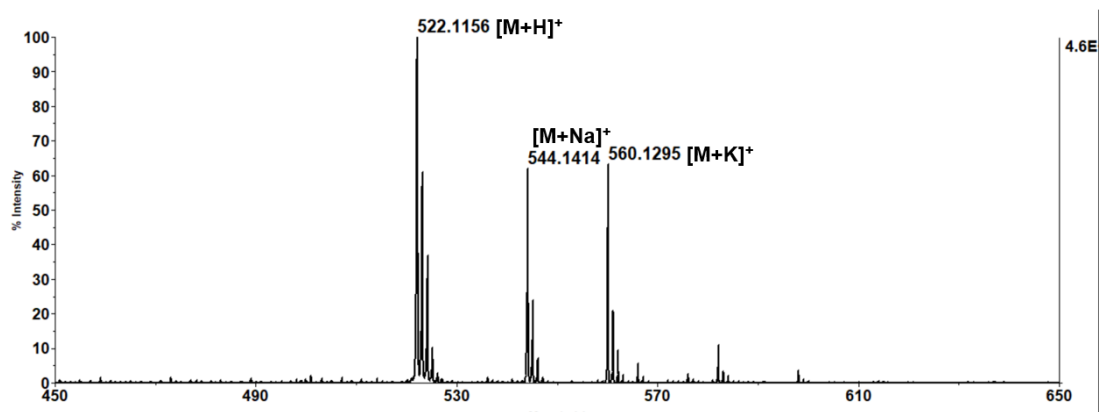

### HPLC

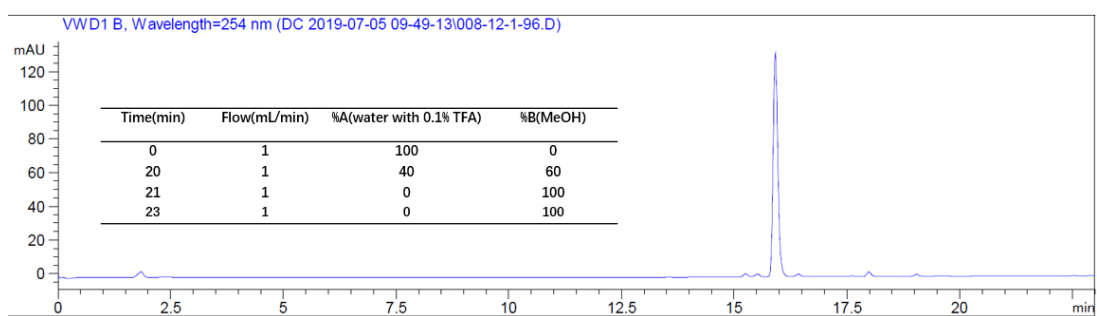

NMR, MALDI-MS and HPLC spectra of compound **1j**

HNMR

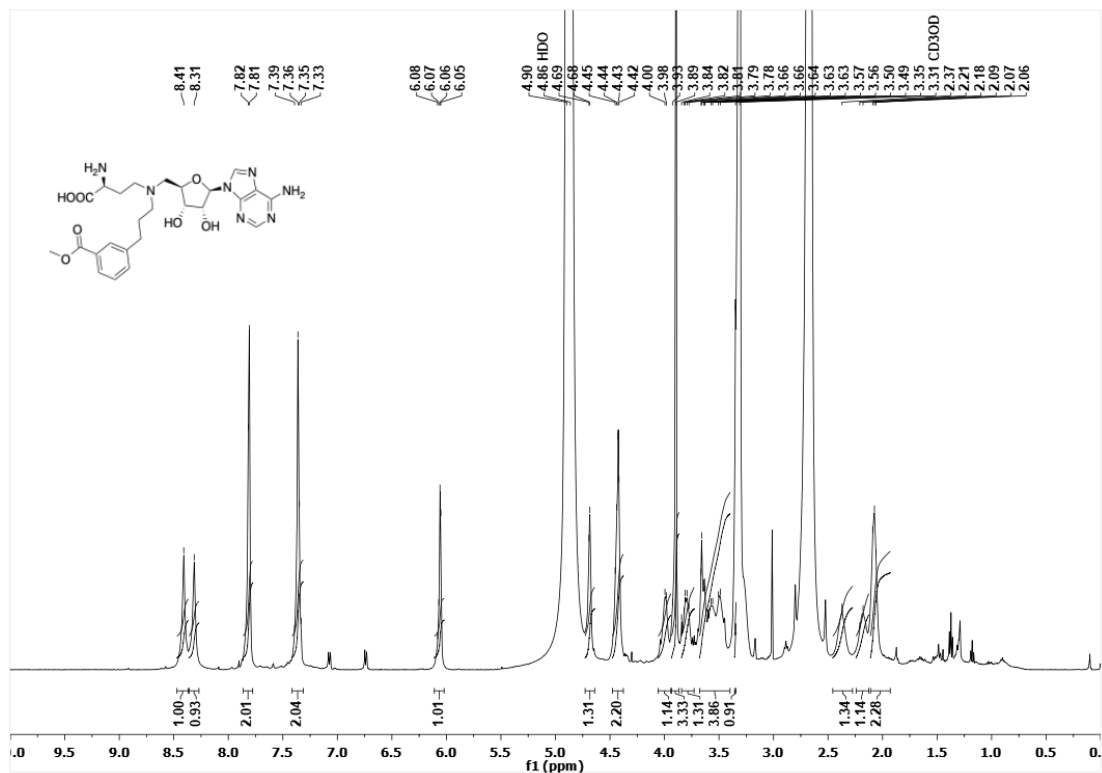

CNMR

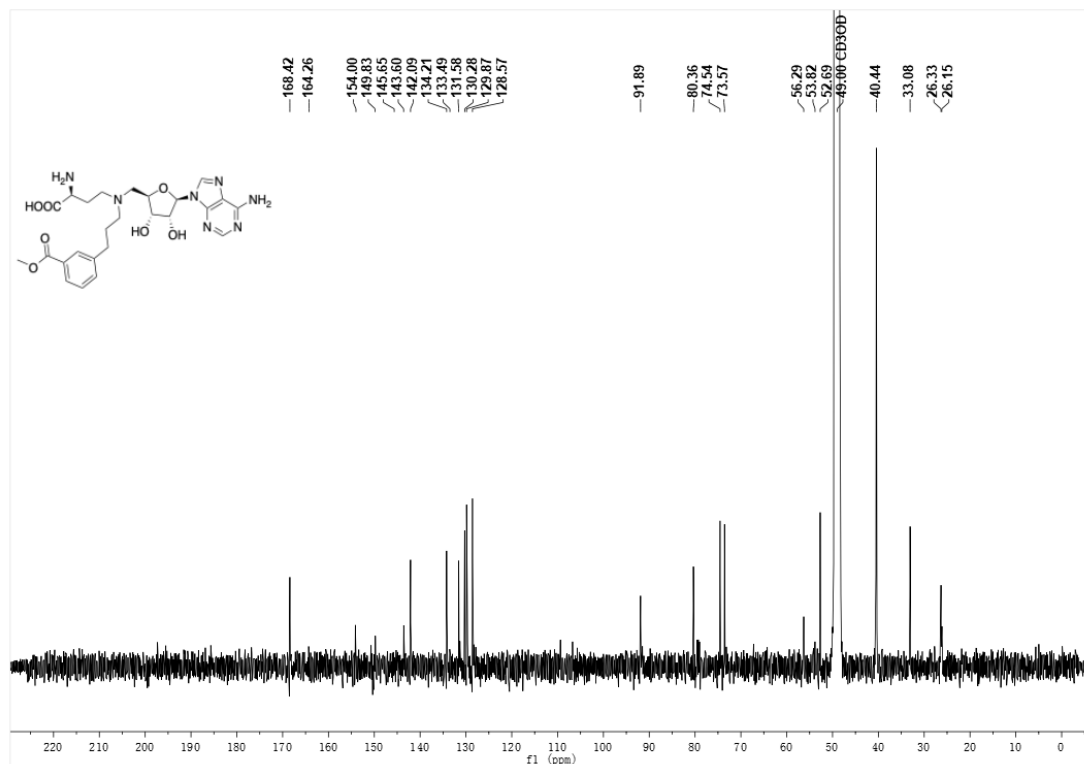

### MALDI-MS

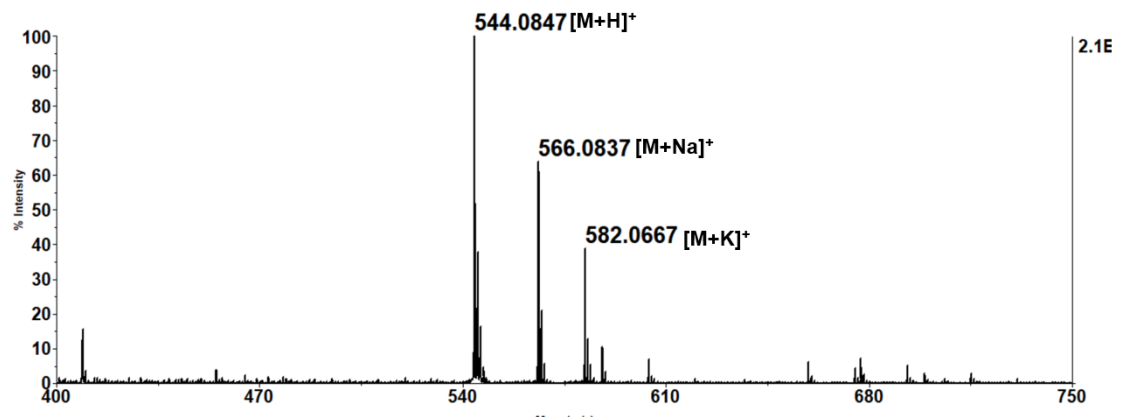

### HPLC

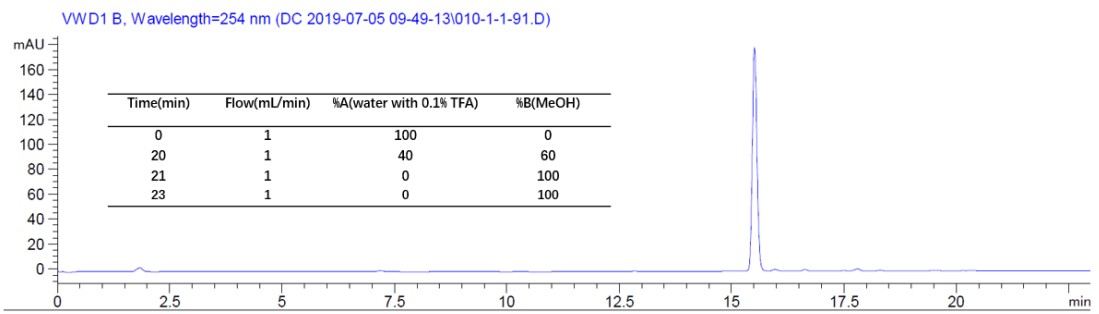

NMR, MALDI-MS and HPLC spectra of compound **2a**

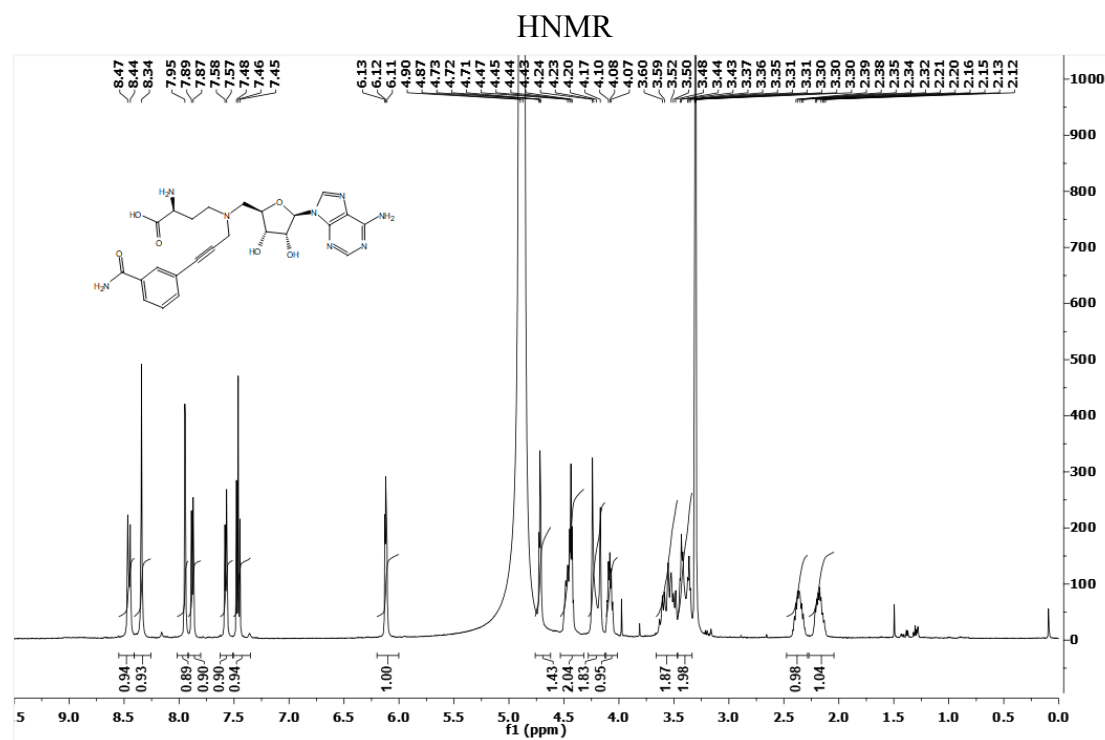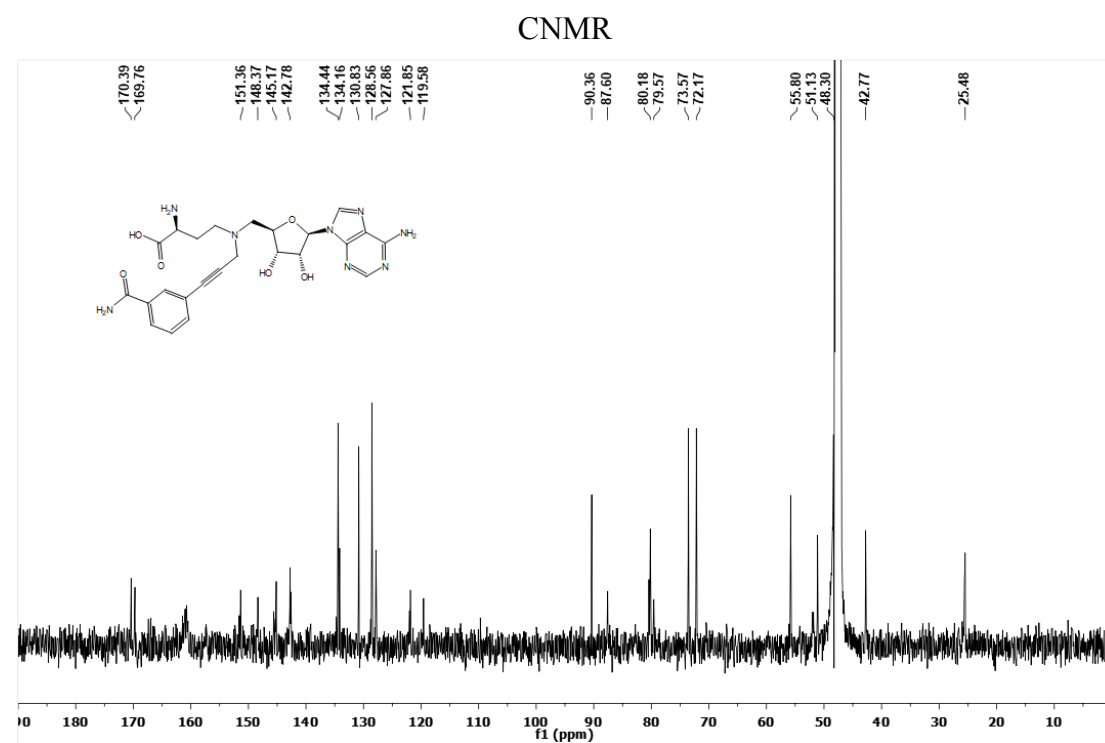



# MALDI-MS

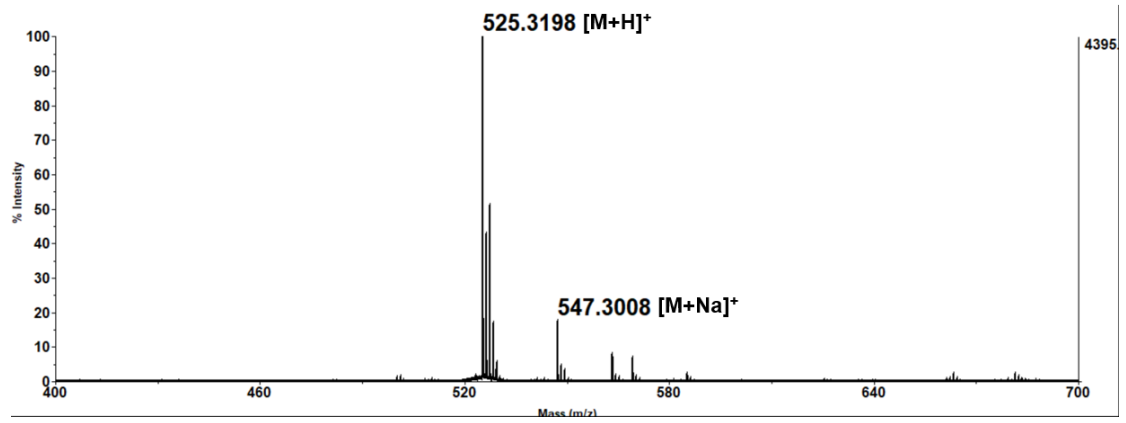

# HPLC

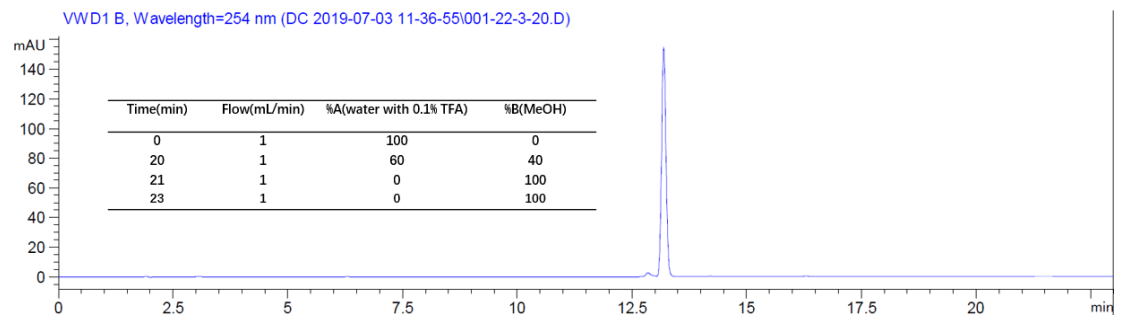

NMR, MALDI-MS and HPLC spectra of compound **2a\***

H-NMR

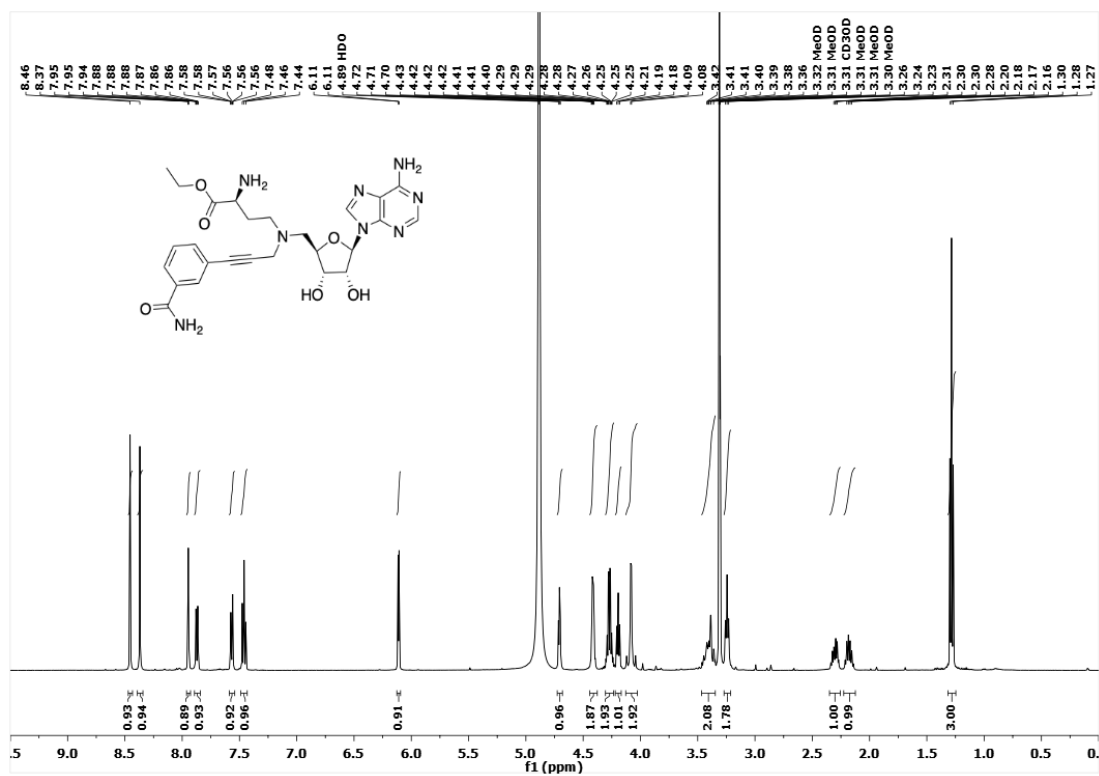

C-NMR

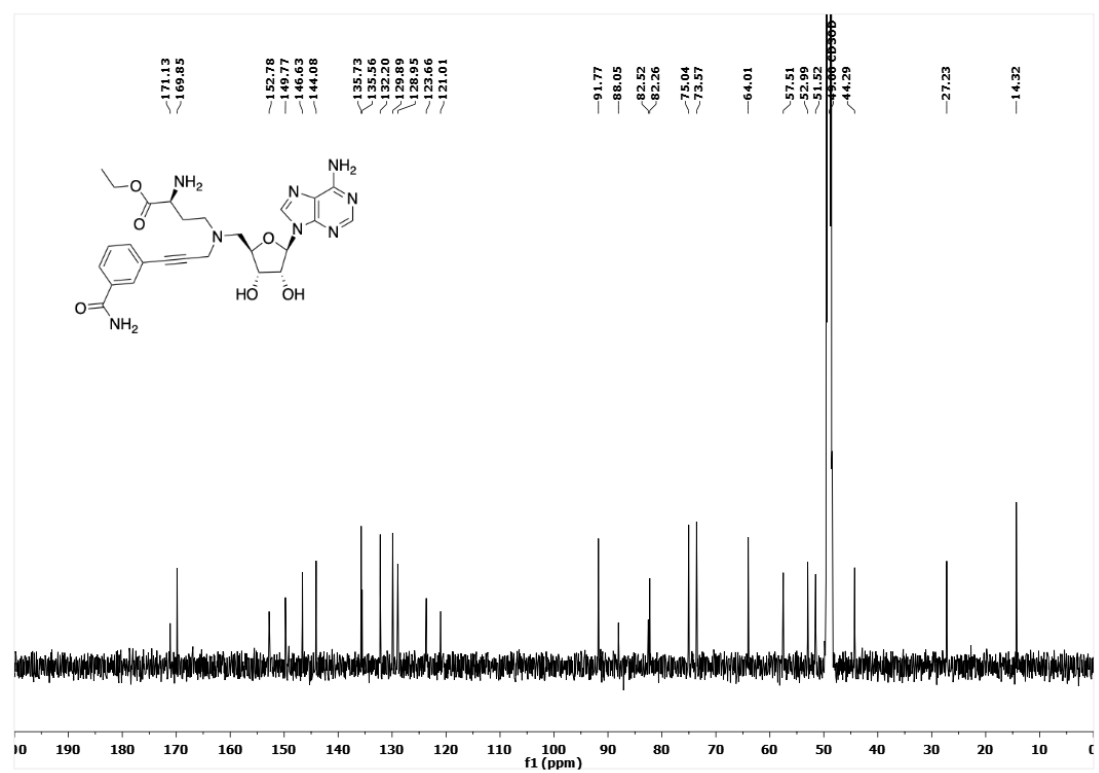

### MALDI-MS

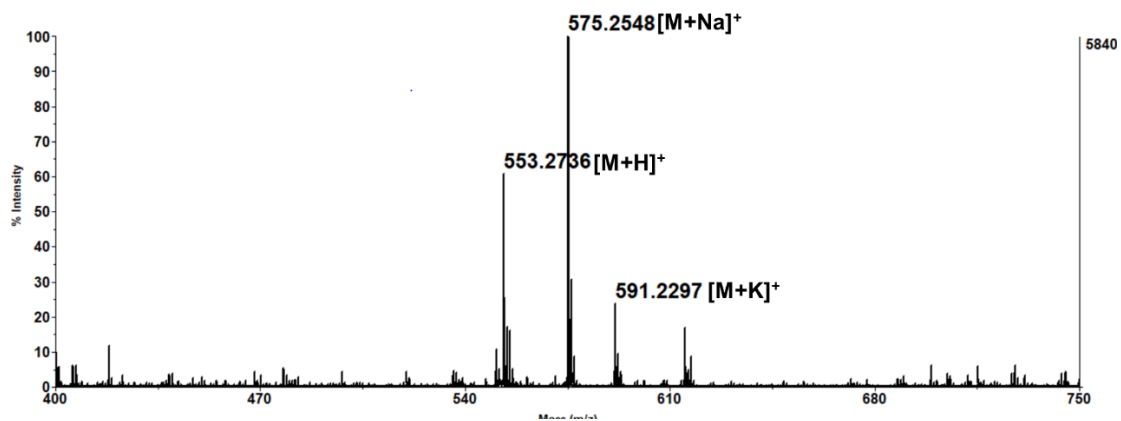

### HPLC

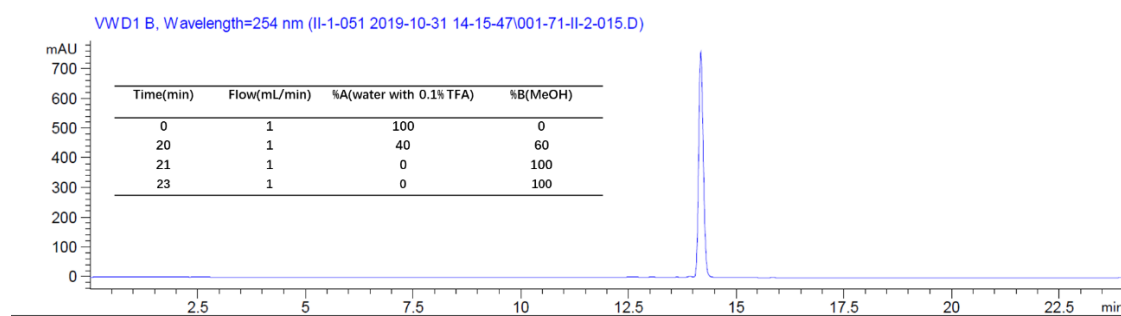

# NMR, MALDI-MS and HPLC spectra of compound 2b

## HNMR

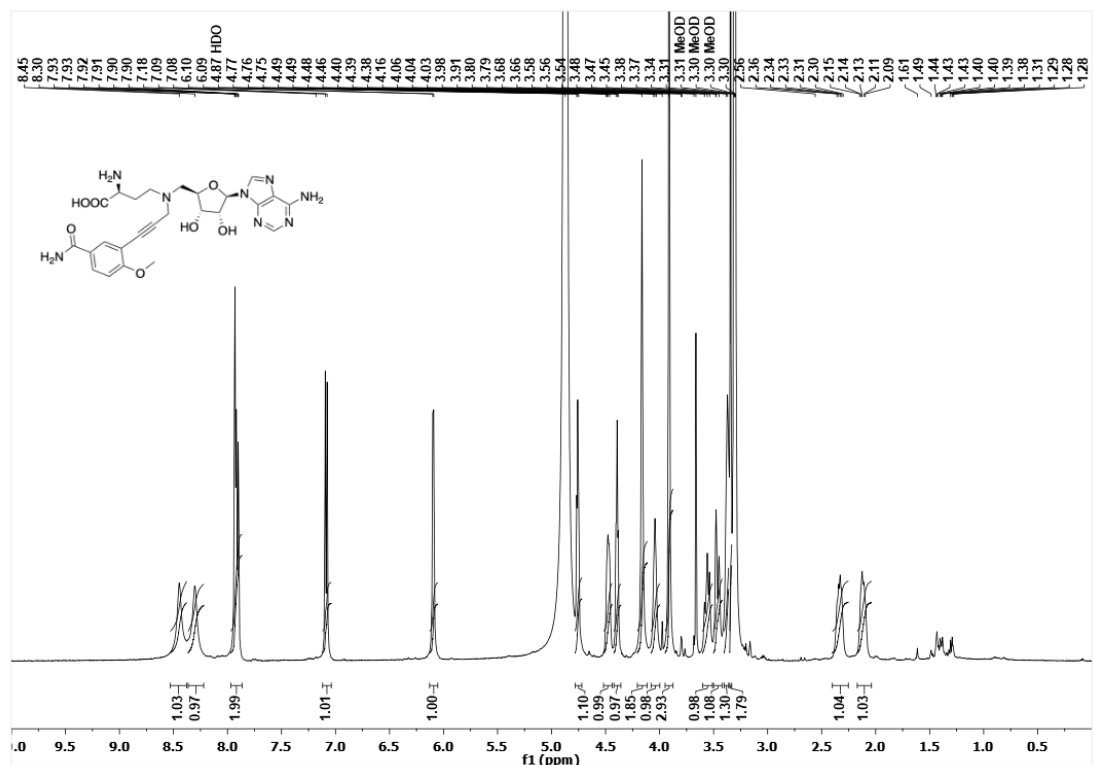

## CNMR

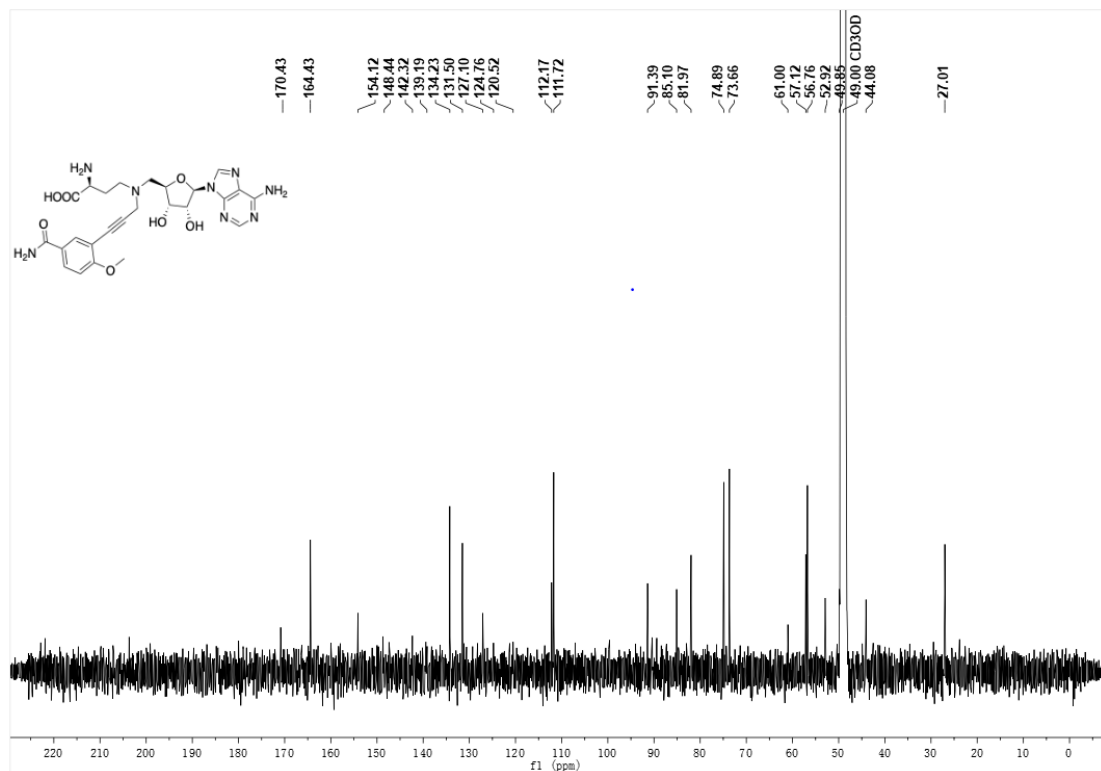

# MALDI-MS

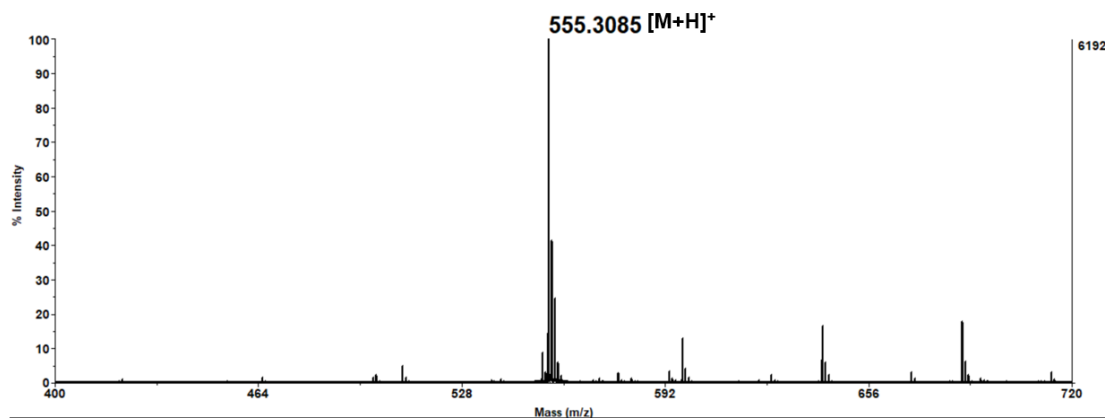

# HPLC

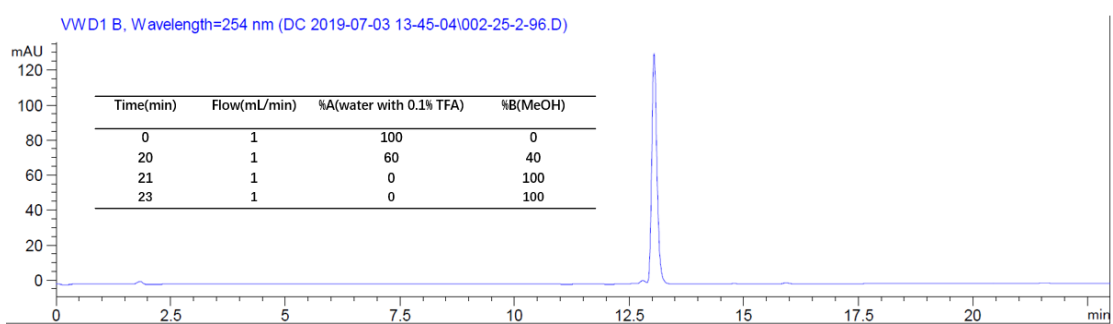

# NMR, MALDI-MS and HPLC spectra of compound 2c

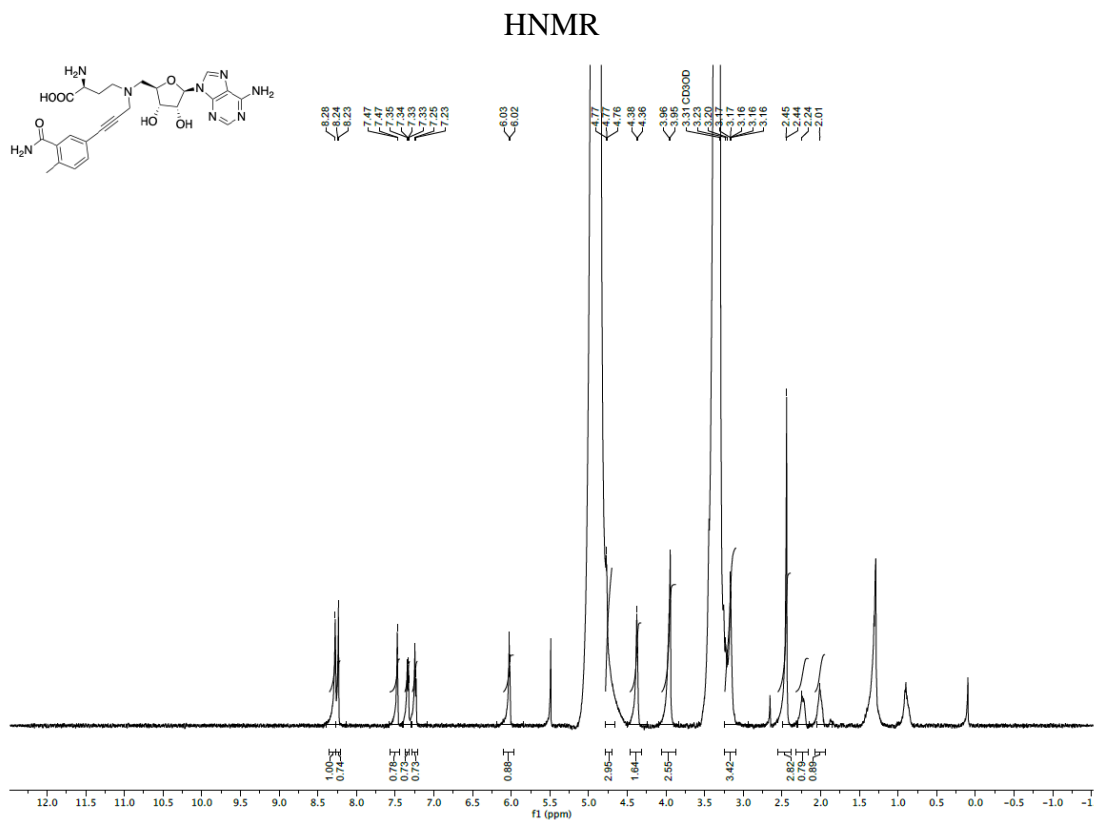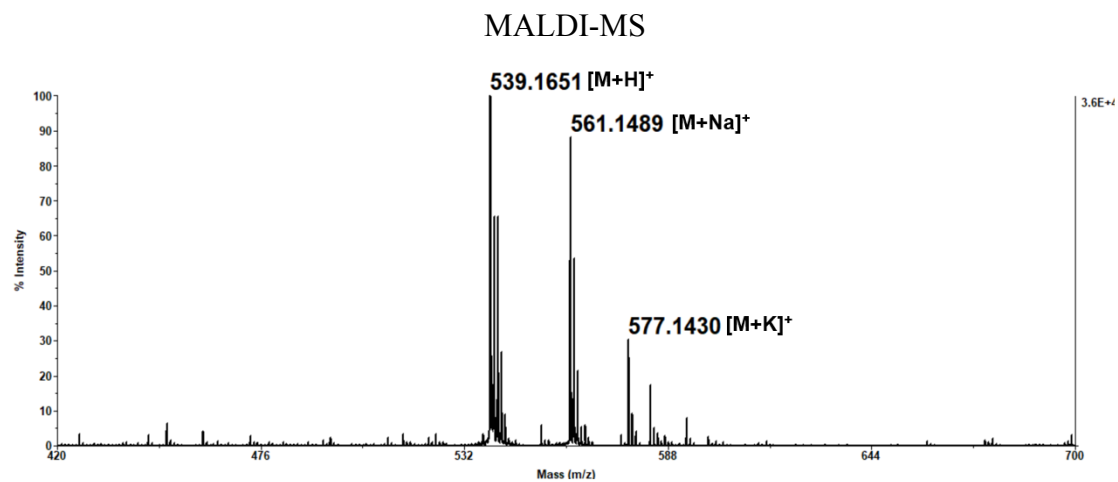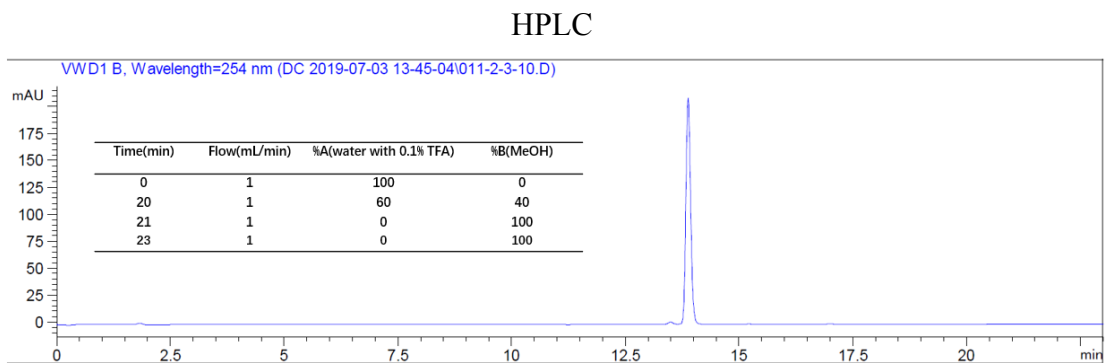

NMR, MALDI-MS and HPLC spectra of compound **2d**

HNMR

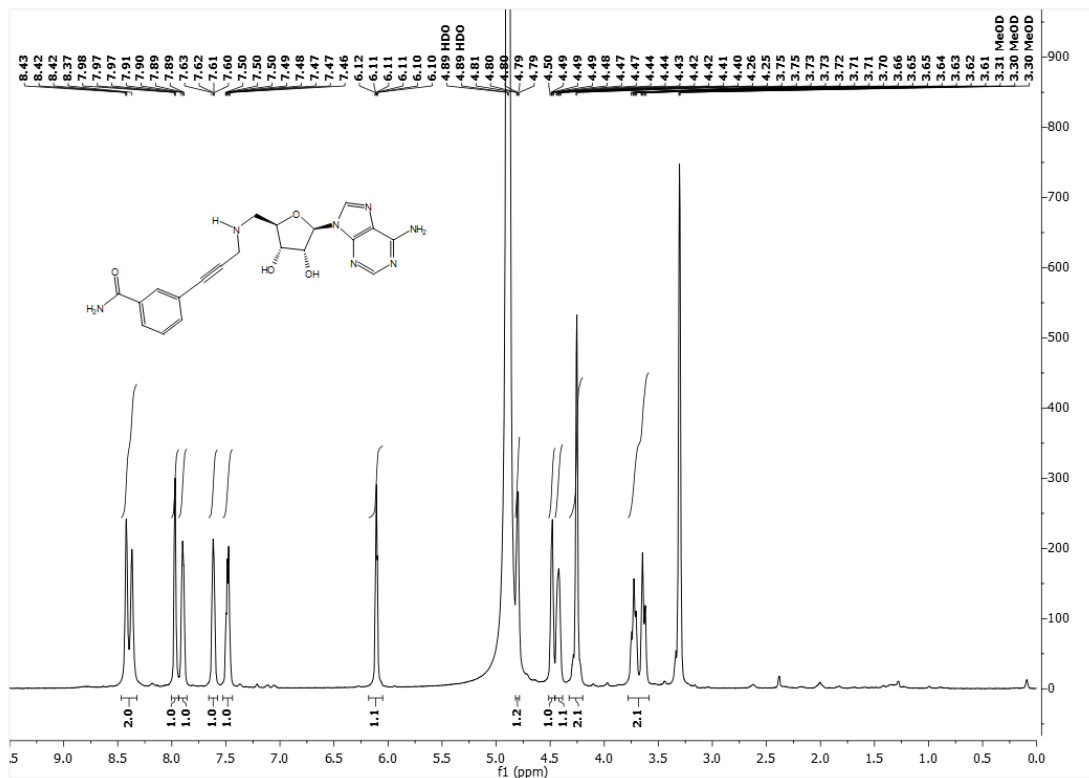

CNMR

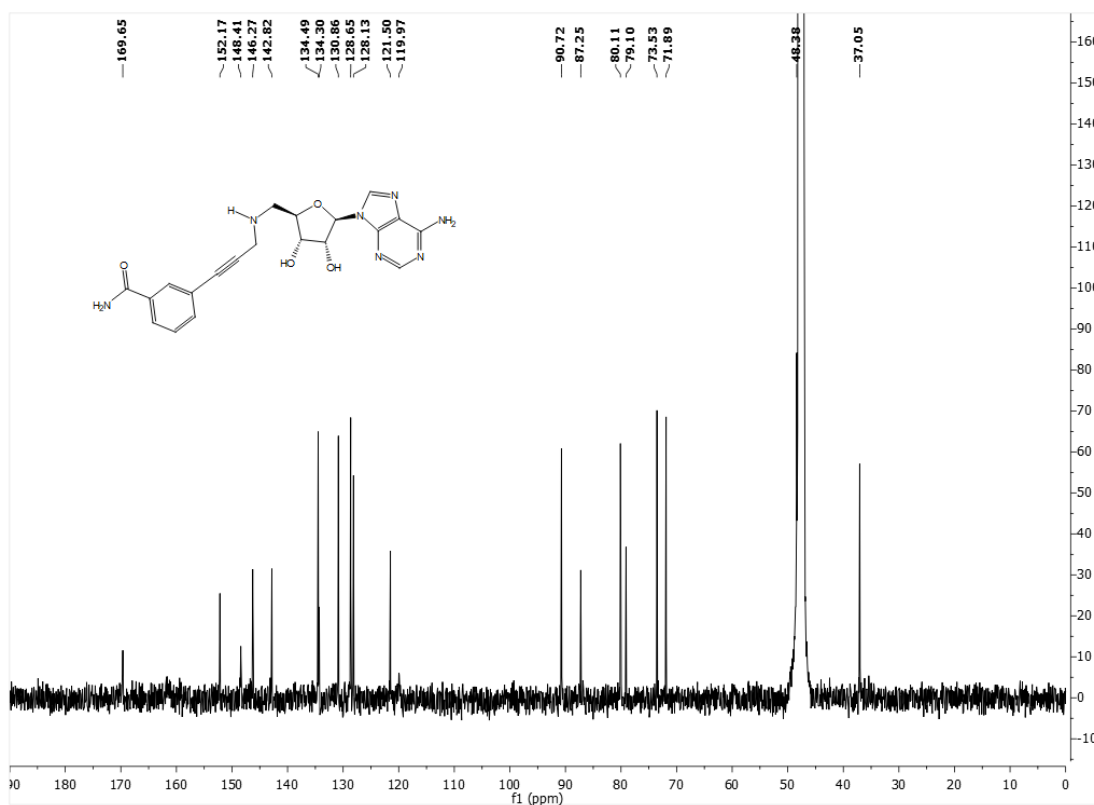

# MALDI-MS

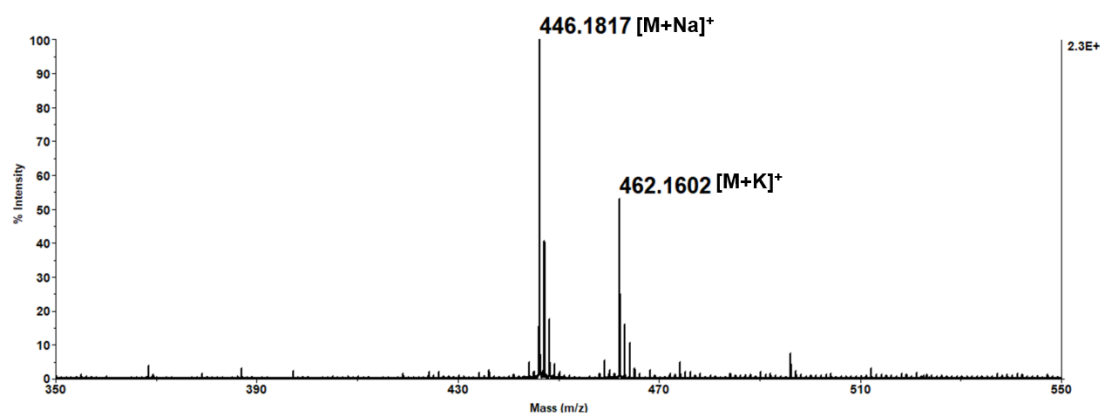

# HPLC

VWD1 B, Wavelength=254 nm (DC 2019-07-03 13-45-041003-26-3-35.D)

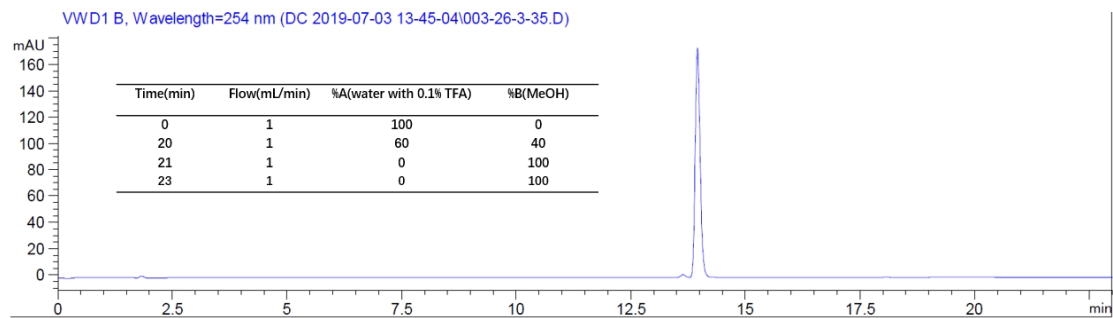



NMR, MALDI-MS and HPLC spectra of compound **3a**

HNMR

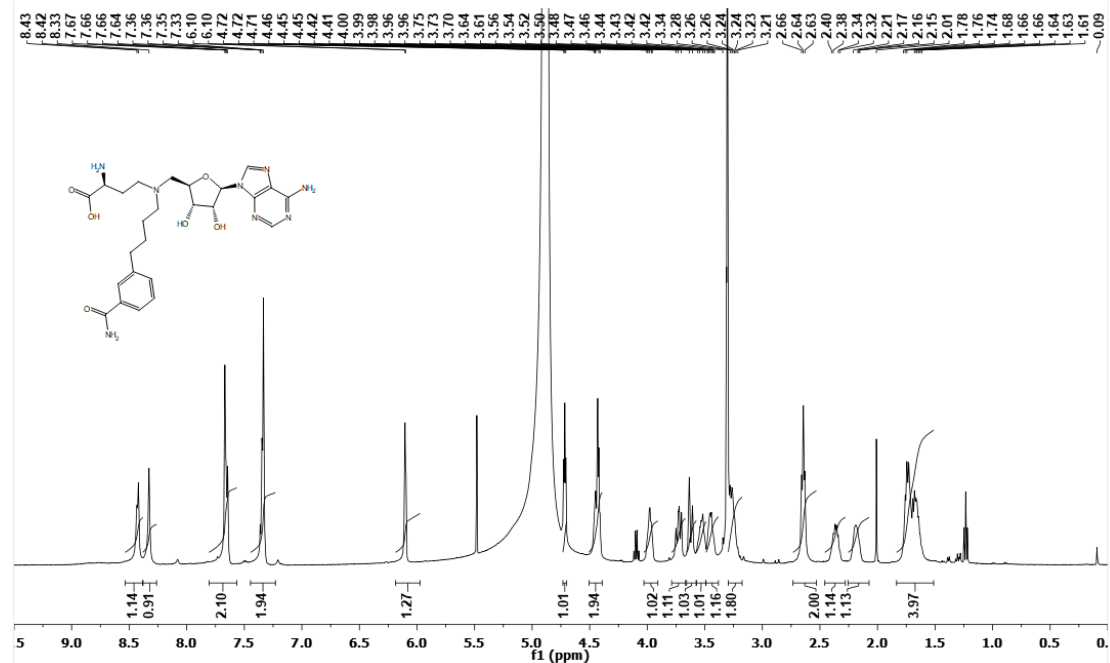

CNMR

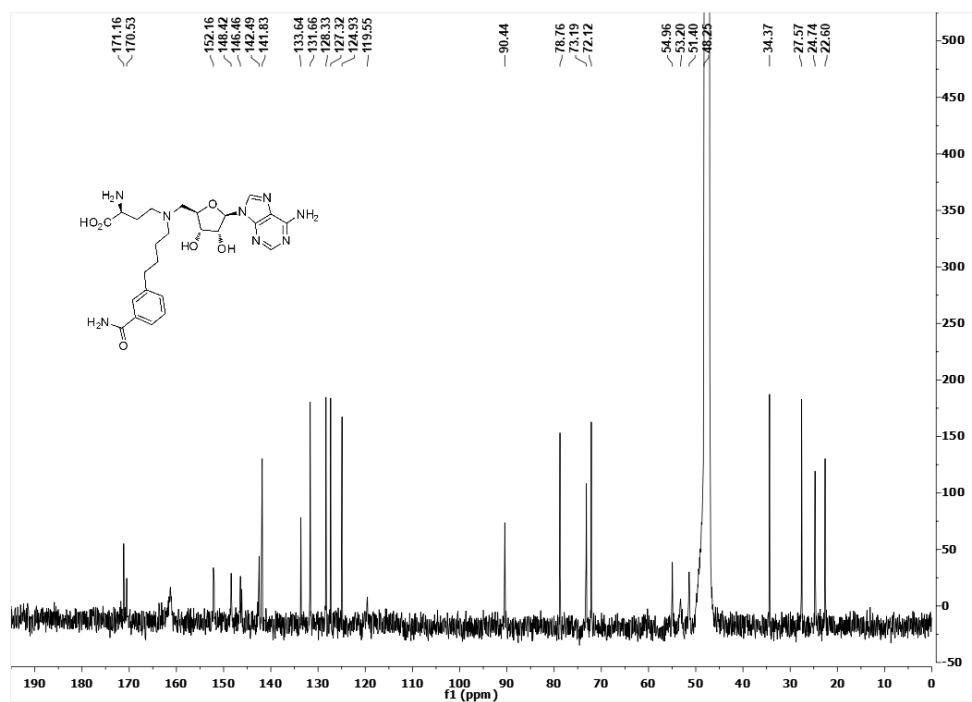

# MALDI-MS

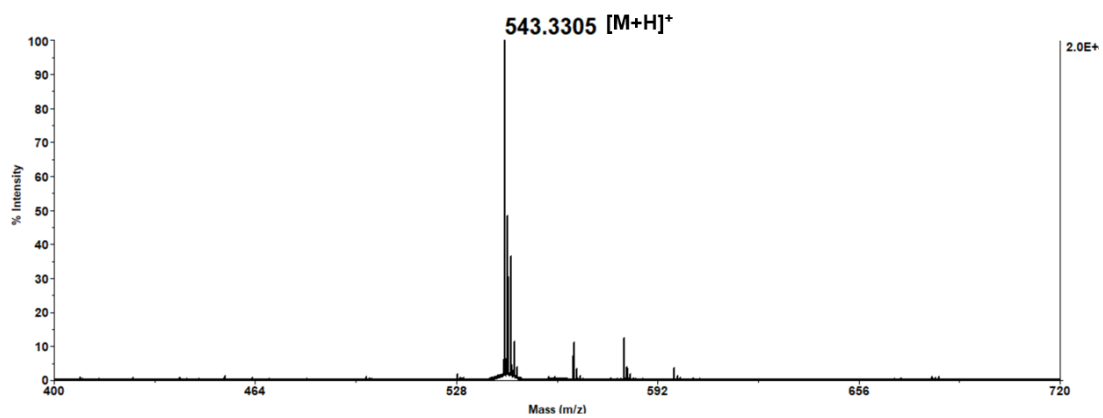

# HPLC

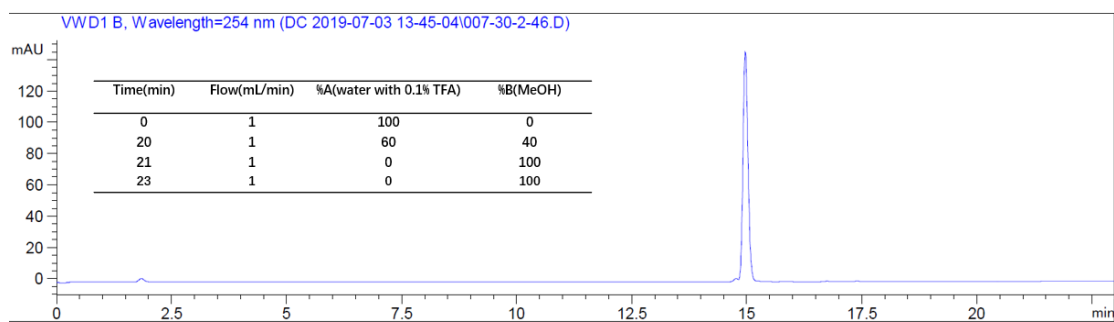

# NMR, MALDI-MS and HPLC spectra of compound 3b

## HNMR

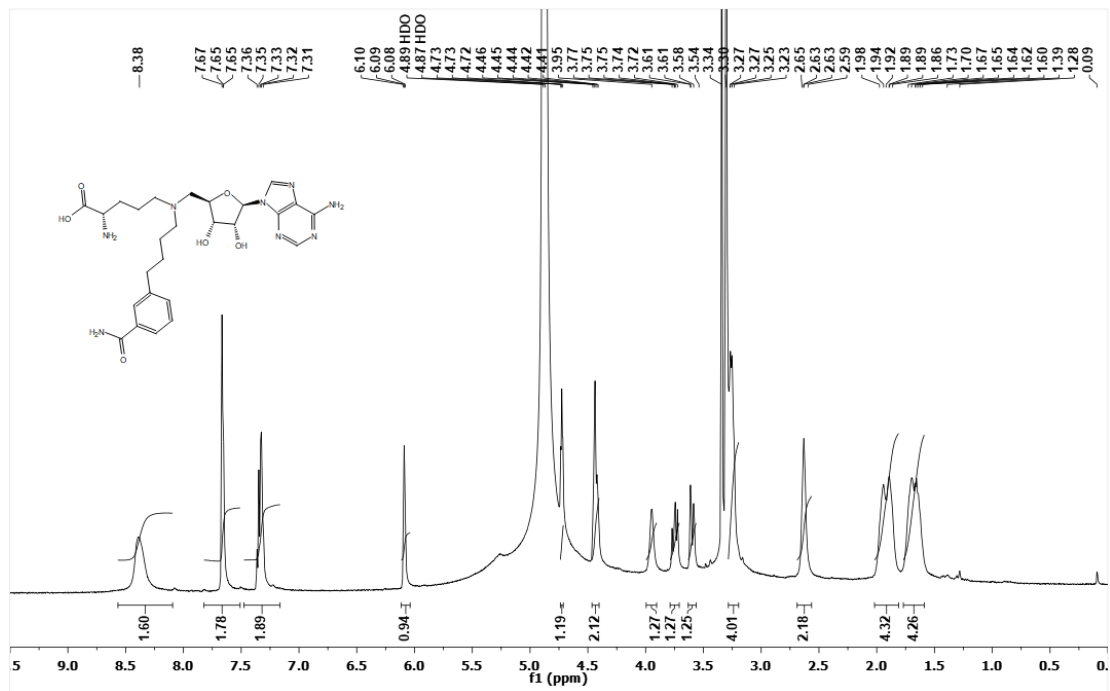

## MALDI-MS

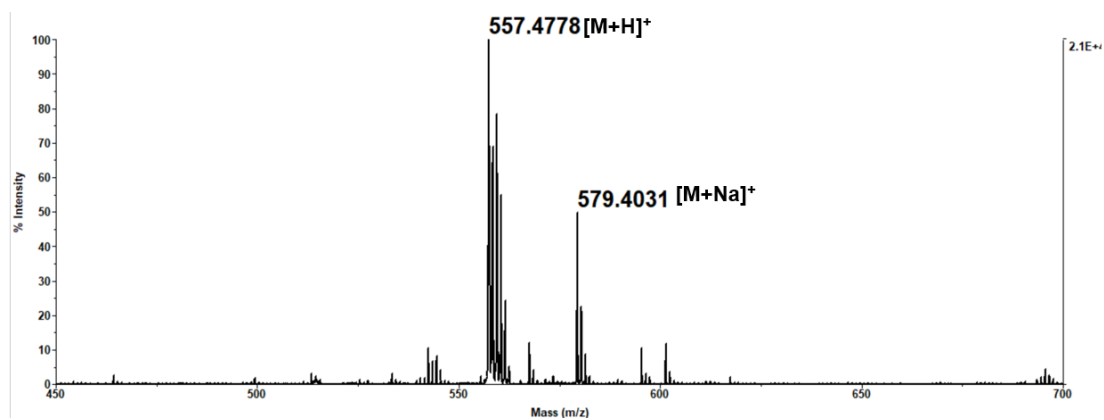

## HPLC

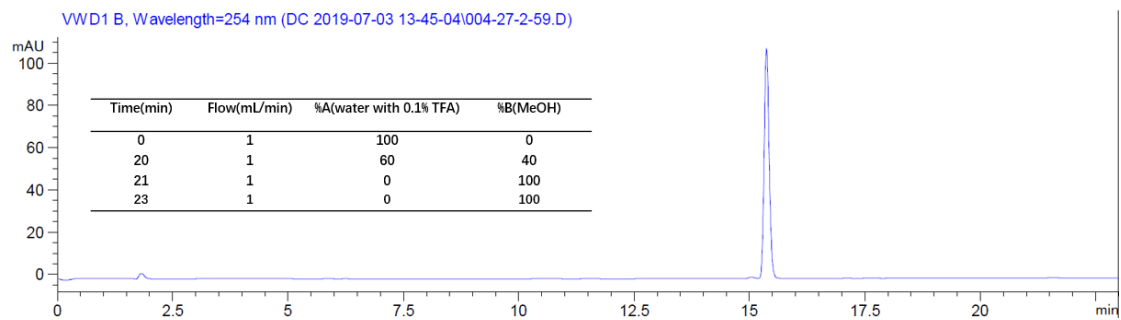

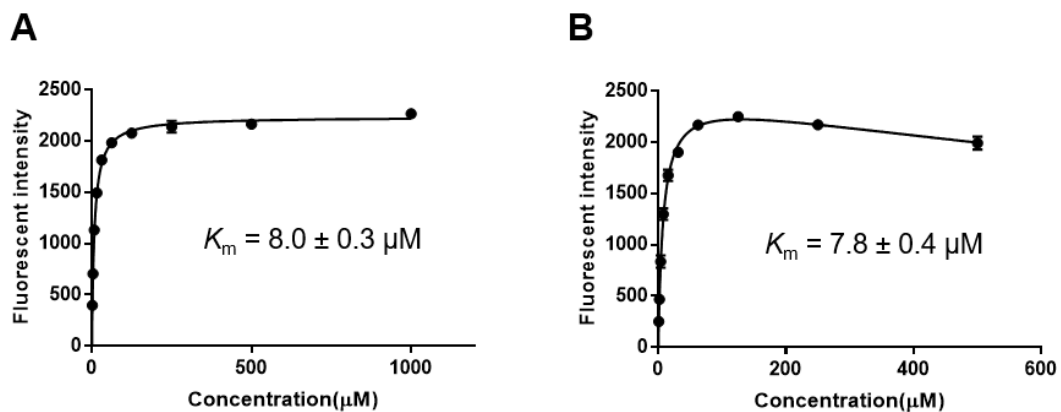

**Supporting Figure S1.** Kinetic parameter determination for NNMT.  $K_m$  values were determined for (A) nicotinamide at fixed SAM concentration (100 μM) and (B) for SAM at fixed concentration of nicotinamide (100 μM). Data were obtained in duplicate.

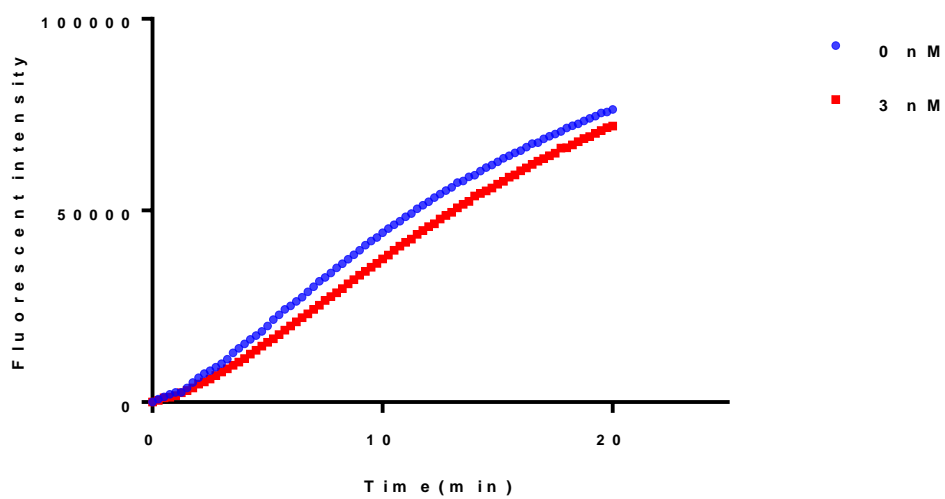

**Supporting Figure S2.** Rapid dilution assay for compound **LL320**

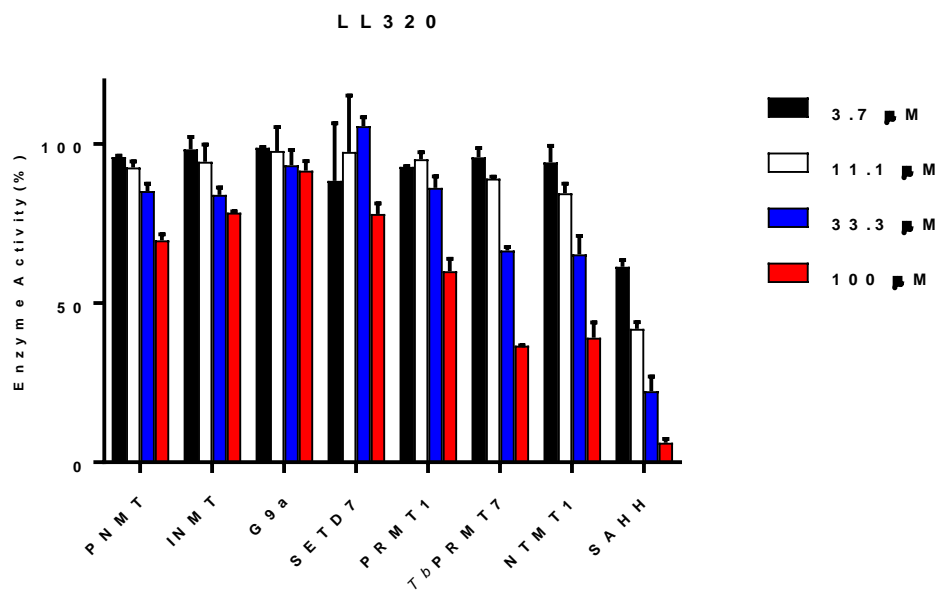

**Supporting Figure S3.** The selectivity study of LL320

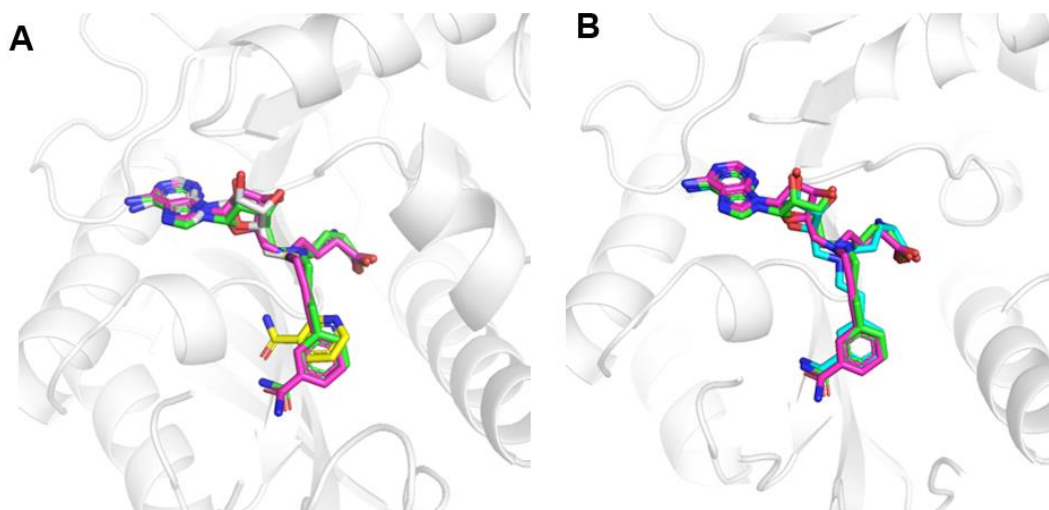

**Supporting Figure S4.** Superimposed co-crystal structures. (A) Overlay co-crystal structures NNMT (gray carton)- LL319 (green stick) (PDB ID: 6PVE), NNMT-LL320 (pink stick) (PDB ID: 6PVS) and NNMT-SAH (gray stick)-nicotinamide (yellow stick) (PDB ID: 3ROD); (B) Overlay co-crystal structures NNMT (gray carton)- LL319 (green stick) (PDB ID: 6PVE), NNMT-LL320 (pink stick) (PDB ID: 6PVS) and NNMT- MS2756 (blue stick) (PDB ID: 6CHH).

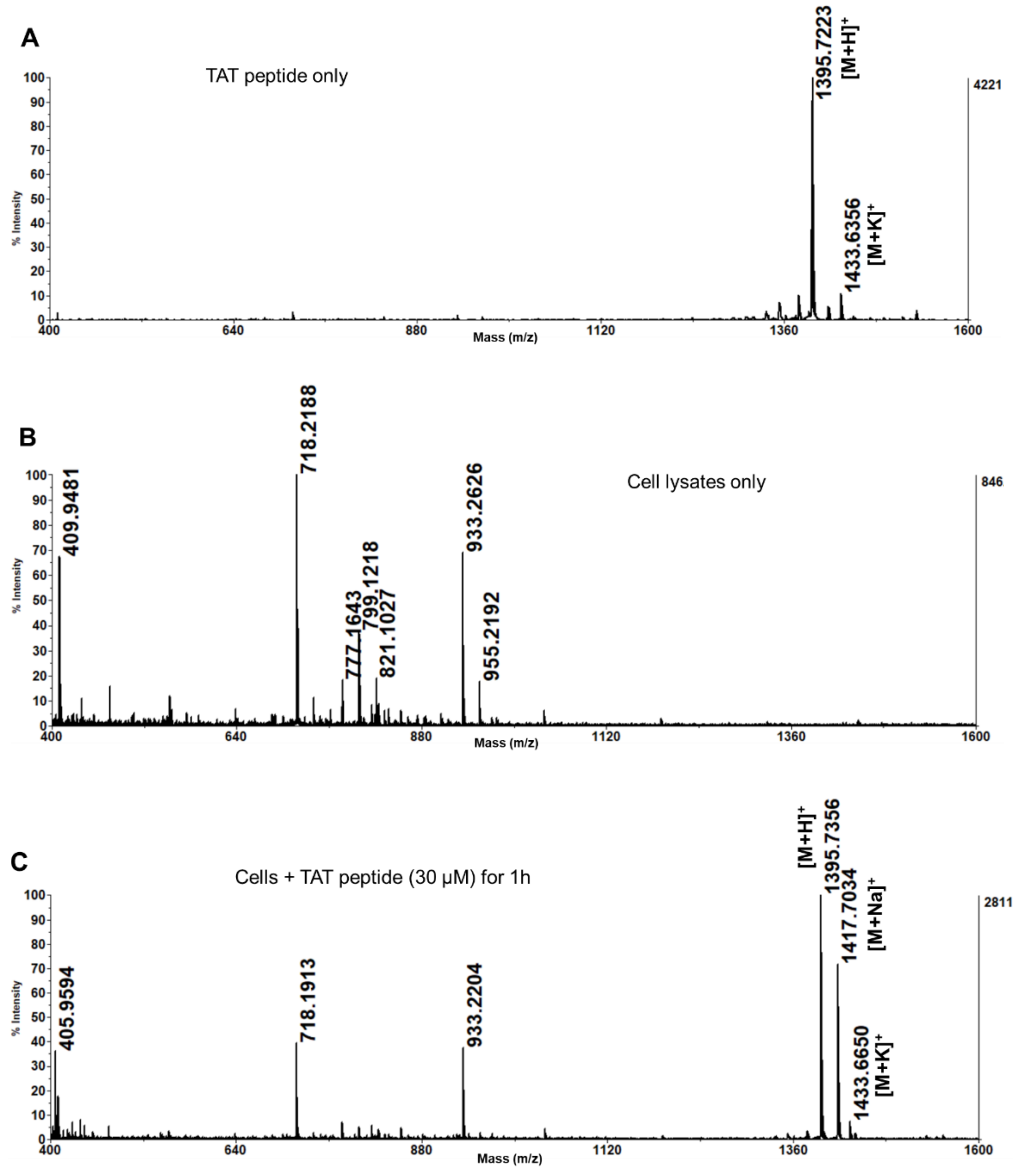

**Supporting Figure S5.** Cell permeability evaluation of TAT peptide as positive control. (A) MALDI-MS for TAT peptide (GRKKRRQRRR-NH<sub>2</sub>) only; (B) MALDI-MS for cell lysates only; (C) MALDI-MS for incubation of 30 μM TAT peptide with HCT116 cells for 1h.



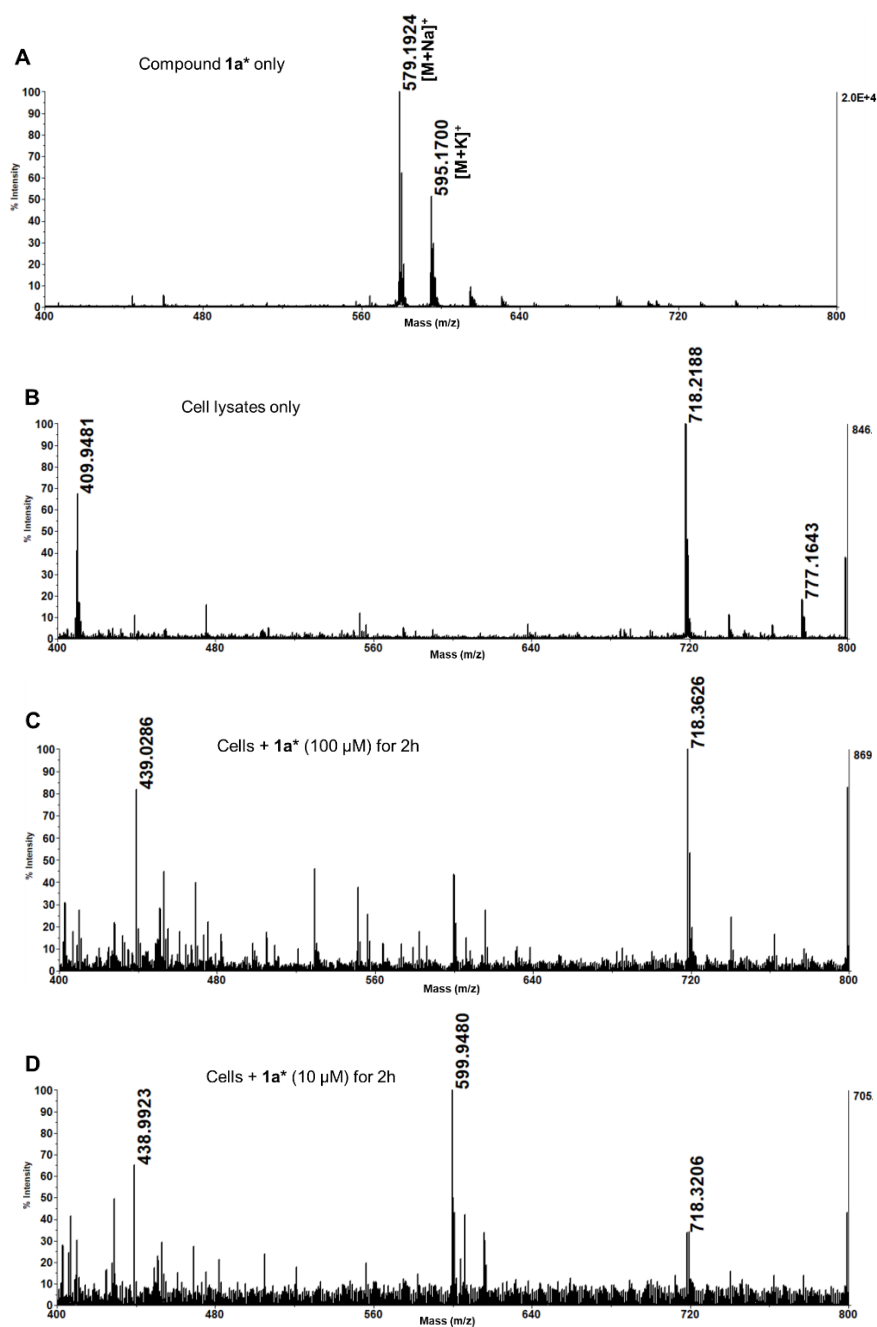

**Supporting Figure S6.** Cell permeability evaluation of **1a\***. (A) MALDI-MS for compound **1a\*** only; (B) MALDI-MS for cell lysates only; (C) and (D) MALDI-MS for incubation of 100  $\mu$ M and 10  $\mu$ M **1a\*** with HCT116 cells for 2h, respectively.  $[\mathbf{1a^*}+\text{H}]^+ = 557.3$ ,  $[\mathbf{1a^*}+\text{Na}]^+ = 579.3$ ,  $[\mathbf{1a^*}+\text{K}]^+ = 595.2$ ,  $[\mathbf{1a^*}\text{-Et}+\text{H}]^+ = 529.3$ ,  $[\mathbf{1a^*}\text{-Et}+\text{Na}]^+ = 551.2$ ,  $[\mathbf{1a^*}\text{-Et}+\text{K}]^+ = 567.2$ .

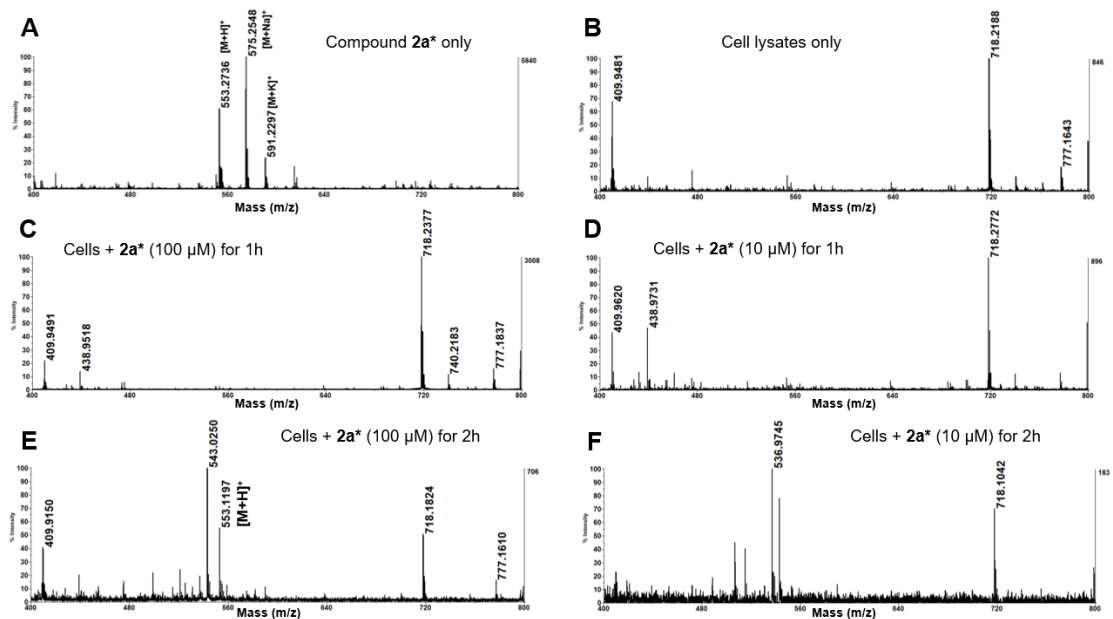

**Supporting Figure S7.** Cell permeability evaluation of **2a\***. (A) MALDI-MS for compound **2a\*** only; (B) MALDI-MS for cell lysates only; (C) and (D) MALDI-MS for incubation of 100  $\mu\text{M}$  and 10  $\mu\text{M}$  **2a\*** with HCT116 cells for 1h, respectively; (E) and (F) MALDI-MS for incubation of 100  $\mu\text{M}$  and 10  $\mu\text{M}$  **2a\*** with HCT116 cells for 2h, respectively.  $[\mathbf{2a^*}+\text{H}]^+ = 553.3$ ,  $[\mathbf{2a^*}+\text{Na}]^+ = 575.2$ ,  $[\mathbf{2a^*}+\text{K}]^+ = 591.2$ ,  $[\mathbf{2a^*}-\text{Et}+\text{H}]^+ = 525.2$ ,  $[\mathbf{2a^*}-\text{Et}+\text{Na}]^+ = 547.2$ ,  $[\mathbf{2a^*}-\text{Et}+\text{K}]^+ = 563.2$ .

**Supplementary Table S1. Crystallography data and refinement statistics (PDB ID: 6PVE and 6PVS)**

| <b>Data Collection</b>                   | <b>NNMT/LL319</b>       | <b>NNMT/LL320</b>          |
|------------------------------------------|-------------------------|----------------------------|
| $\lambda$ (Å)                            | 1.0332                  | 1.0332                     |
| Space group                              | P1                      | P1                         |
| a, b, c (Å)                              | 45.90, 62.36, 107.86    | 46.23, 62.53, 108.36       |
| $\alpha, \beta, \gamma$ (°)              | 91.78, 97.61, 111.56    | 82.72, 82.48, 68.34        |
| Resolution (Å)*                          | 50 – 2.30 (2.38 – 2.30) | 50.90 – 2.57 (2.71 – 2.57) |
| Completeness (%)*                        | 98.3 (99.1)             | 88.4 (94.7)                |
| Redundancy*                              | 2.8 (2.8)               | 1.8 (1.8)                  |
| $R_{\text{sym}}^{\dagger*}$              | 0.22 (0.75)             | 0.16 (1.0)                 |
| $I / \sigma(I)^*$                        | 7.64 (1.6)              | 1.9 (0.6)                  |
| $CC_{1/2}$                               | 0.95 (0.46)             | 0.98 (0.40)                |
| <b>Refinement</b>                        |                         |                            |
| Resolution (Å)                           | 2.30                    | 2.57                       |
| No. reflections                          | 48089                   | 31186                      |
| $R^{\S}/R_{\text{free}}^{\P}$            | 0.20/0.24               | 0.23/0.29                  |
| <b>r.m.s. deviations</b>                 |                         |                            |
| Bonds (Å)                                | 0.008                   | 0.008                      |
| Angles (°)                               | 1.35                    | 1.31                       |
| No. Protein atoms                        | 8172                    | 8144                       |
| No. Ligand atoms                         | 152                     | 152                        |
| No. Waters                               | 500                     | 106                        |
| <b>B-factors (Å<sup>2</sup>)</b>         |                         |                            |
| Wilson B                                 | 20.28                   | 42.12                      |
| Protein                                  | 25.01                   | 44.84                      |
| Ligands                                  | 16.59                   | 39.83                      |
| Waters                                   | 26.36                   | 37.69                      |
| <b>Ramachandran Analysis<sup>‡</sup></b> |                         |                            |
| Favored (%)                              | 97.61                   | 96.08                      |
| Allowed (%)                              | 2.20                    | 3.53                       |
| Outliers (%)                             | 0.19                    | 0.38                       |
| PDB code                                 | 6PVE                    | 6PVS                       |

<sup>†</sup>  $R_{\text{sym}} = \sum_{hkl,j} (|I_{hkl} - \langle I_{hkl} \rangle|) / \sum_{hkl,j} I_{hkl}$ , where  $\langle I_{hkl} \rangle$  is the average intensity for a set of j symmetry related reflections and  $I_{hkl}$  is the value of the intensity for a single reflection within a set of symmetry-related reflections.

<sup>§</sup> R factor =  $\sum_{hkl} (||F_o| - |F_c||) / \sum_{hkl} |F_o|$  where  $F_o$  is the observed structure factor amplitude and  $F_c$  is the calculated structure factor amplitude.

<sup>¶</sup>  $R_{\text{free}} = \sum_{hkl,T} (||F_o| - |F_c||) / \sum_{hkl,T} |F_o|$ , where a test set, T (5% of the data), is omitted from the

refinement.

‡ Performed using Molprobit within PHENIX.

\* Indicates statistics for last resolution shell shown in parenthesis.

## Reference

- (1) Zhang, G.; Richardson, S. L.; Mao, Y.; Huang, R. Design, Synthesis, and Kinetic Analysis of Potent Protein N-Terminal Methyltransferase 1 Inhibitors. *Org. Biomol. Chem.* **2015**, *13* (14), 4149–4154.
- (2) Douat, C.; Heitz, A.; Martinez, J.; Fehrentz, J. A. Stereoselective Synthesis of Allyl- and Homoallylglycines. *Tetrahedron Lett.* **2001**, *42* (19), 3319–3321.
